# Supplementary material for: Palladium-catalyzed intramolecular carboborylation of 1,3-diene and synthesis of ABCD ring of communesins
Source: Royal Society of Chemistry journal article supplement (doi:10.1039/c8ob02224k), 2018-10-04

## Contents

|                                              |     |
|----------------------------------------------|-----|
| General                                      | S2  |
| Material                                     | S2  |
| Experimental Procedures                      | S2  |
| $^1\text{H}$ and $^{13}\text{C}$ NMR spectra | S15 |

## General

All non-aqueous reactions were carried out under a positive atmosphere of argon in dried glassware. Analytical thin-layer chromatography was performed with Silica gel 60 (Merck). Silica gel column chromatography was performed with Kanto silica gel 60 (particle size, 63–210  $\mu\text{m}$ ) and Fuji silysia Chromatorex BW-300. Proton nuclear magnetic resonance ( $^1\text{H}$  NMR) spectra were recorded on a JEOL JNM-ECA 500 at 500 MHz or a JEOL JNM-AL 400 at 400 MHz. Chemical shifts are reported relative to  $\text{Me}_4\text{Si}$  ( $\delta$  0.00) in  $\text{CDCl}_3$  and residual  $(\text{CH}_3)(\text{CH}_2\text{D})\text{S}(\text{O})$  ( $\delta$  2.50) in  $\text{DMSO-d}_6$ . Multiplicity is indicated by one or more of the following: s (singlet); d (doublet); t (triplet); q (quartet); m (multiplet); br (broad). Carbon nuclear magnetic resonance ( $^{13}\text{C}$  NMR) spectra were recorded on a JEOL JNM-ECA 500 at 126 MHz or a JEOL JNM-AL 400 at 101 MHz. Chemical shifts are reported relative to  $\text{CDCl}_3$  ( $\delta$  77.0) and  $\text{DMSO-d}_6$  ( $\delta$  39.5). Infrared spectra were recorded on a FT/IR-4100 Fourier-transform infrared spectrometer ATR (attenuated total reflectance). Low and high resolution mass spectra (LRMS and HRMS) were recorded on JEOL JMS-HX/HX 110A mass spectrometer and JEOL JMS-700 mass spectrometer.

## Material

Anhydrous  $\text{CH}_2\text{Cl}_2$ , 1,2-dichloroethane, xylene, DMF, methanol and  $\text{CH}_3\text{CN}$  were purchased from KANTO Chemical Co. Aldrich and Wako chemicals. Materials were obtained from Tokyo Chemical Industry Co., Ltd. Aldrich Inc., and other commercial suppliers and used without further purification.

## Experimental Procedures

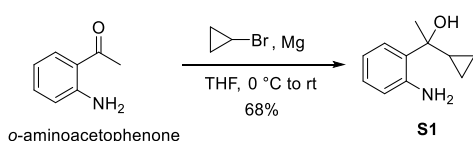

### Alcohol **S1**:

To a suspension of Mg (1.16 g, 46.6 mmol) in THF (40.0 mL) was added bromocyclopropane (3.60 mL, 44.4 mmol) dropwise, and the mixture was stirred at 0 °C for 1 h. *O*-aminoacetophenone (2.70 mL, 22.2 mmol) in THF (55 mL) was then added to the reaction mixture, and the mixture was stirred at room temperature for 6.5 h. The reaction mixture was then cooled to 0 °C and quenched with 2M aqueous HCl solution, followed by 10% aqueous NaOH solution to neutralize. The mixture was extracted with EtOAc three times. The combined organic layers were washed with brine and dried over  $\text{Na}_2\text{SO}_4$ . The solution was filtered and concentrated under reduced pressure. The resultant residue was purified by flash column chromatography on silica gel (10–40% EtOAc/hexane) to give alcohol **S1** (2.67 g, 68%) as a light-yellow oil;  $^1\text{H}$  NMR (500

MHz, CDCl<sub>3</sub>)  $\delta$  7.34 (dd, 1H,  $J$  = 7.7, 1.1 Hz, 1H), 7.05 (td, 1H,  $J$  = 7.6, 1.1 Hz), 6.69 (td, 1H,  $J$  = 8.2, 1.1 Hz), 6.61 (d, 1H,  $J$  = 7.2 Hz), 1.43 (s, 3H), 1.42 (m, 1H), 0.61 (m, 1H), 0.54-0.47 (m, 2H), 0.39 (m, 1H); <sup>13</sup>C NMR (126 MHz, CDCl<sub>3</sub>)  $\delta$  145.5, 130.3, 128.0, 126.7, 117.7, 117.5, 75.5, 24.5, 21.5, 2.9, 1.1; HRMS calcd for C<sub>11</sub>H<sub>15</sub>NONa [M+Na]<sup>+</sup> 200.1051; Found:  $m/z$  200.1050.

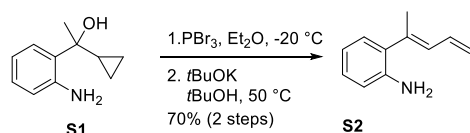

#### (*E*)-Dienylaniline **S2**:

To a solution of alcohol **S1** (1.92 g, 10.83 mmol) in Et<sub>2</sub>O (50.0 mL) was added phosphorus tribromide (1.56 mL, 21.66 mmol) in Et<sub>2</sub>O (23.0 mL) at -20 °C to -10 °C dropwise, and the solution was stirred at -20 °C for 1.5 h. The reaction solution was then cooled to 0 °C and treated with 10% aqueous NaOH solution to pH 9. The mixture was extracted with EtOAc three times. The combined organic layers were washed with brine and dried over Na<sub>2</sub>SO<sub>4</sub>. The solution was filtered and concentrated under reduced pressure to give a crude bromide.

To a solution of the above crude bromide in *t*BuOH (50.0 mL) was added potassium *tert*-butoxide (2.00 g, 17.82 mmol), and the mixture was stirred at 50 °C for 2.5 h. The reaction mixture was then cooled to room temperature and diluted with Et<sub>2</sub>O. The organic layer was washed with water and brine, and dried over Na<sub>2</sub>SO<sub>4</sub>. The solution was filtered and concentrated under reduced pressure. The resultant residue was purified by flash column chromatography on silica gel (10% EtOAc/hexane) to give (*E*)-dienylaniline **S2** (1.21 g, 70% in 2 steps) as a colorless oil; <sup>1</sup>H NMR (500 MHz, CDCl<sub>3</sub>)  $\delta$  7.07 (ddd, 1H,  $J$  = 7.7, 7.7, 1.6 Hz), 7.02 (dd, 1H,  $J$  = 7.6, 1.6 Hz), 6.78-6.70 (m, 3H), 6.16 (d, 1H,  $J$  = 11.7 Hz), 5.24 (d, 1H,  $J$  = 16.9 Hz), 5.18 (d, 1H,  $J$  = 10.3 Hz), 3.75 (br, 2H), 2.11 (d, 3H,  $J$  = 0.9 Hz); <sup>13</sup>C NMR (126 MHz, CDCl<sub>3</sub>)  $\delta$  143.0, 136.3, 133.0, 130.6, 130.0, 128.5, 127.9, 118.3, 117.3, 115.6, 17.8; HRMS calcd for C<sub>11</sub>H<sub>14</sub>N [M+H]<sup>+</sup> 160.1126; Found:  $m/z$  160.1133.

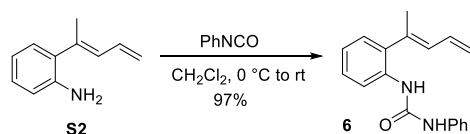

#### (*E*)-Dienylurea **6**:

To a solution of (*E*)-dienylaniline **S2** (838.1 mg, 5.26 mmol) in CH<sub>2</sub>Cl<sub>2</sub> (17.0 mL) was added phenyl isocyanate (629.0  $\mu$ L, 5.79 mmol) at 0 °C. The solution was stirred at room temperature for 2.5 h. The reaction solution was then concentrated under reduced pressure to give (*E*)-

dienylurea **6** (1.42 g, 97%) as a white solid;  $^1\text{H}$  NMR (500 MHz,  $\text{CDCl}_3$ )  $\delta$  7.90 (d, 1H,  $J = 8.3$  Hz), 7.32-7.27 (m, 5H), 7.13-7.07 (m, 3H), 6.72 (br, 1H), 6.65 (br, 1H), 6.61 (ddd, 1H,  $J = 16.9$ , 10.9, 10.8 Hz), 6.02 (d, 1H,  $J = 10.9$  Hz, 1H), 5.21 (d, 1H,  $J = 16.9$  Hz), 5.20 (d, 1H,  $J = 10.8$  Hz), 2.00 (s, 3H);  $^{13}\text{C}$  NMR (126 MHz,  $\text{CDCl}_3$ )  $\delta$  153.3, 137.7, 136.5, 135.5, 134.5, 132.4, 131.3, 129.4, 128.6, 128.1, 124.6, 124.1, 122.2, 121.8, 118.6, 18.2; HRMS calcd for  $\text{C}_{18}\text{H}_{19}\text{N}_2\text{O}$   $[\text{M}+\text{H}]^+$  279.1497; Found:  $m/z$  279.1493.

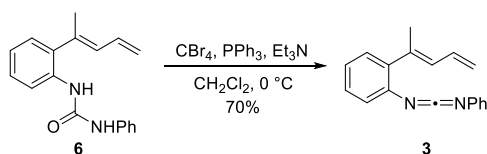

#### (*E*)-Dienylcarbodiimide **3**:

To a solution of (*E*)-dienylurea **6** (96.5 mg, 0.347 mmol) and  $\text{PPh}_3$  (200.0 mg, 0.760 mmol) in  $\text{CH}_2\text{Cl}_2$  (4.0 mL) were added  $\text{Et}_3\text{N}$  (200.0  $\mu\text{L}$ , 1.43 mmol) and  $\text{CBr}_4$  (250.0 mg, 0.754 mmol) in  $\text{CH}_2\text{Cl}_2$  (1.0 mL) at  $0\text{ }^\circ\text{C}$ . The reaction solution was stirred at  $0\text{ }^\circ\text{C}$  for 40 min. The resultant solution was then concentrated under reduced pressure. The obtained residue was suspended in 50%  $\text{EtOAc}$ /hexane and filtered on silica pad. The filtrate was concentrated under reduced pressure, and the residue was purified by flash column chromatography on neutral silica gel (20%  $\text{EtOAc}$ /hexane) to give (*E*)-dienylcarbodiimide **3** (62.8 mg, 70%) as a yellow oil. The product was not stable, thus it was used for the next reaction immediately;  $^1\text{H}$  NMR (400 MHz,  $\text{CDCl}_3$ )  $\delta$  7.29 (dd, 2H,  $J = 7.6$ , 7.6 Hz), 7.24-7.19 (m, 3H), 7.16-7.12 (m, 4H), 6.65 (ddd, 1H,  $J = 16.9$ , 10.9, 10.6 Hz), 6.14 (d, 1H,  $J = 10.9$  Hz), 5.23 (d, 1H,  $J = 16.9$  Hz), 5.15 (d, 1H,  $J = 10.6$  Hz), 2.16 (s, 1H);  $^{13}\text{C}$  NMR (101 MHz,  $\text{CDCl}_3$ )  $\delta$  140.2, 138.8, 136.5, 135.4, 132.8, 131.0, 129.4, 129.3, 128.0, 125.5, 125.2, 125.1, 124.1, 117.8, 18.2. (Compound **3** was too unstable to measure HRMS.)

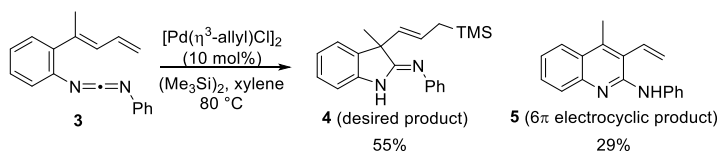

#### 2-iminoindoline **4** and quinoline **5**:

To a solution of (*E*)-dienylcarbodiimide **3** (23.2 mg, 0.0891 mmol) in anhydrous xylene (1.0 mL) was added hexamethyldisilane (40.0  $\mu\text{L}$ , 0.195 mmol) and  $[\text{Pd}(\eta^3\text{-allyl})\text{Cl}]_2$  (3.3 mg,  $8.91 \times 10^{-3}$  mmol) at room temperature. The reaction atmosphere was replaced by the Ar atmosphere. The mixture was then stirred at  $80\text{ }^\circ\text{C}$  for 15.5 h. The mixture was cooled to room temperature,

concentrated under reduced pressure. The obtained residue was purified by flash column chromatography on silica gel (0-50% EtOAc/hexane) to give 2-iminoindoline **4** (16.3 mg, 55%) as a white solid and quinoline **5** (6.7 mg, 29%) as a white solid; 2-iminoindoline **4**:  $^1\text{H}$  NMR (400 MHz,  $\text{CDCl}_3$ )  $\delta$  7.75 (d, 2H,  $J = 7.8$  Hz), 7.39-7.34 (m, 3H), 7.10-6.96 (m, 4H), 6.34 (br, 1H), 5.82 (dd, 1H,  $J = 15.6, 8.0, 8.0$  Hz), 5.24 (d, 1H,  $J = 15.6$  Hz), 1.54 (d, 2H,  $J = 8.0$  Hz), 1.48 (s, 3H), 0.03 (s, 9H);  $^{13}\text{C}$  NMR (101 MHz,  $\text{CDCl}_3$ )  $\delta$  172.9, 155.3, 140.5, 139.5, 129.2, 128.9, 128.0, 127.7, 123.0, 122.4, 121.6, 118.9, 117.8, 56.5, 23.0, 22.2, -1.9; HRMS calcd for  $\text{C}_{21}\text{H}_{27}\text{N}_2\text{Si}$   $[\text{M}+\text{H}]^+$  335.1944; Found:  $m/z$  335.1942; quinoline **5**:  $^1\text{H}$  NMR (400 MHz,  $\text{CDCl}_3$ )  $\delta$  7.87-7.81 (m, 4H), 7.56 (ddd, 1H,  $J = 8.9, 8.9, 1.8$  Hz), 7.37-7.29 (m, 3H), 7.04-7.00 (m, 2H), 6.81 (dd, 1H,  $J = 17.9, 11.6$  Hz), 5.89 (dd, 1H,  $J = 11.6, 2.0$  Hz), 5.61 (dd, 1H,  $J = 17.9, 2.0$  Hz), 2.58 (d, 3H,  $J = 0.7$  Hz);  $^{13}\text{C}$  NMR (101 MHz,  $\text{CDCl}_3$ )  $\delta$  150.9, 146.1, 141.2, 140.6, 132.5, 129.0, 128.8, 127.6, 124.0, 123.9, 123.7, 123.0, 122.0, 121.7, 119.2, 15.5.

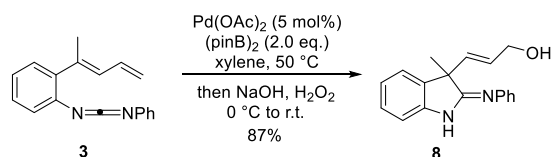

### Iminoindoline **8**

To a solution of carbodiimide **3** (30.0 mg, 0.115 mmol) in xylene (1.5 mL) were added  $(\text{pinB})_2$  (55.5 mg, 0.218 mmol) and  $\text{Pd}(\text{OAc})_2$  (1.3 mg, 0.00575 mmol) at room temperature. The resulting mixture was stirred at 50 °C overnight. After the reaction mixture was cooled to 0 °C, aqueous NaOH (10% w/v, 0.3 mL, 0.75 mmol) and aqueous  $\text{H}_2\text{O}_2$  (30% w/v, 0.078 mL, 0.69 mmol) were added. The reaction mixture was stirred at room temperature for 2 h. After addition of saturated aqueous  $\text{NH}_4\text{Cl}$ , the reaction was extracted with EtOAc. The combined organic layers were washed with brine and dried over  $\text{Na}_2\text{SO}_4$ . Evaporation of the solvent and purification of the residue by column chromatography on silica gel (5%-20% ethyl acetate/hexanes) gave iminoindoline **8** as a colorless oil;  $^1\text{H}$  NMR (500 MHz,  $\text{DMSO}-d_6$ )  $\delta$  9.21 (s, 1H), 8.02 (d, 2H,  $J = 7.8$  Hz), 7.32 (dd, 2H,  $J = 8.6, 7.4$  Hz), 7.22-7.15 (m, 3H), 7.00-6.95 (m, 2H), 5.87 (d, 1H,  $J = 13.7$  Hz), 5.53 (ddd, 1H,  $J = 13.7, 4.8, 4.6$  Hz), 4.76 (dd, 1H,  $J = 5.4, 5.2$  Hz), 3.92 (ddd, 2H,  $J = 5.2, 4.8, 1.7$  Hz), 1.52 (s, 3H);  $^{13}\text{C}$  NMR (126 MHz,  $\text{DMSO}-d_6$ )  $\delta$  173.1, 155.3, 140.8, 139.7, 130.4, 129.2, 128.5, 127.7, 122.1, 121.9, 121.6, 118.9, 116.8, 60.9, 55.8, 22.0; IR (film,  $\text{cm}^{-1}$ ) 3439, 2975, 2918, 2251, 2125, 1668, 1469, 1383, 1236, 1090, 1054, 1025, 1005, 891, 820; MS (FAB)  $m/z$  279  $[\text{M}+\text{H}]^+$ ; HRMS calcd for  $\text{C}_{18}\text{H}_{19}\text{N}_2\text{O}$   $[\text{M}+\text{H}]^+$  279.1497; Found:  $m/z$  279.1496.

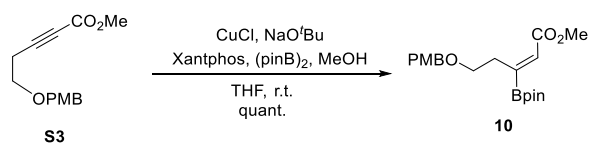

#### Vinylboronate **10**:

A suspension of CuCl (12.0 mg, 0.121 mmol) and NaO'Bu (23.3 mg, 0.242 mmol) and Xantphos (70.0 mg, 0.121 mmol) in anhydrous THF (1.8 mL) was stirred at room temperature for 30 min. A solution of bis(pinacolato)diboron (563.7 mg, 2.22 mmol) in anhydrous THF (1.2 mL) was added to the reaction suspension. The reaction mixture was stirred at room temperature for an additional 10 min. A solution of ester **S3** (501.7 mg, 2.02 mmol) in anhydrous THF (0.9 mL) and following anhydrous MeOH (163  $\mu$ L, 4.04 mmol) were then added to the reaction mixture via cannula. After the reaction mixture was stirred at room temperature for 10.5 h, the mixture was then filtered through Celite. After concentration of the filtrate under reduced pressure, the resultant residue was purified by flash column chromatography on silica gel (10-20% EtOAc/hexane) to give vinylboronate **10** (760.0 mg, quant.) as a colorless oil;  $^1\text{H}$  NMR (500 MHz,  $\text{CDCl}_3$ )  $\delta$  7.25 (d, 2H,  $J = 8.6$  Hz), 6.85 (d, 2H,  $J = 8.6$  Hz), 6.47 (s, 1H), 4.44 (s, 2H), 3.79 (s, 3H), 3.70 (s, 3H), 3.58 (dd, 2H,  $J = 6.9, 6.6$  Hz), 3.03 (dd, 2H,  $J = 6.9, 6.1$  Hz), 1.22 (s, 12H);  $^{13}\text{C}$  NMR (126 MHz,  $\text{CDCl}_3$ )  $\delta$  166.3, 159.0, 130.8, 130.7, 129.2, 113.6, 84.1, 72.1, 69.4, 55.2, 51.1, 30.3, 24.6; IR (ATR,  $\text{cm}^{-1}$ ) 2978, 1721, 1612, 1512, 1465, 1374, 1335, 1244, 1173, 1144, 1092, 1035, 894; MS (FAB)  $m/z$  377  $[\text{M}+\text{H}]^+$ ; HRMS calcd for  $\text{C}_{20}\text{H}_{30}\text{BO}_6$   $[\text{M}+\text{H}]^+$  377.2135; Found:  $m/z$  377.2137.

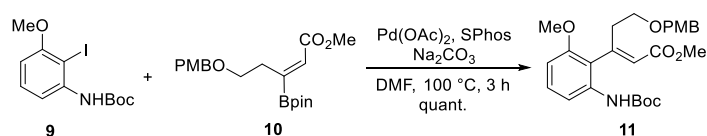

MHz, CDCl<sub>3</sub>)  $\delta$  166.4, 159.1, 156.3, 154.4, 153.3, 136.7, 129.9, 129.2, 128.9, 122.8, 120.8, 113.6, 113.5, 105.2, 80.0, 72.2, 67.3, 55.6, 55.2, 51.2, 32.4, 28.3; IR (ATR, cm<sup>-1</sup>) 3321, 2975, 2360, 1721, 1639, 1589, 1513, 1469, 1435, 1365, 1240, 1160, 1088, 1042, 878; MS (FAB)  $m/z$  472 [M+H]<sup>+</sup>; HRMS calcd for C<sub>26</sub>H<sub>34</sub>NO<sub>7</sub> [M+H]<sup>+</sup> 472.2335; Found:  $m/z$  472.2338.

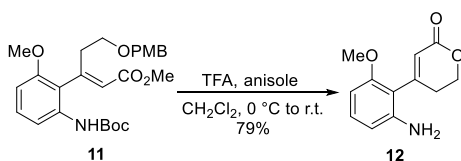

#### Aniline **12**:

To a solution of the coupling product **11** (998.1 mg, 2.12 mmol) in CH<sub>2</sub>Cl<sub>2</sub> (15.0 mL) were added anisole (1.2 mL, 10.6 mmol) and TFA (3.0 mL) at 0 °C, and the solution was stirred at room temperature for 6.5 h. After addition of saturated aqueous NaHCO<sub>3</sub>, the mixture was extracted with EtOAc. The combined organic layers were washed with brine and dried over Na<sub>2</sub>SO<sub>4</sub>. After concentration under reduced pressure, purification by flash column chromatography on silica gel (10-60% EtOAc/hexane) gave aniline **12** (366.5 mg, 79%) as a yellow solid; <sup>1</sup>H NMR (500 MHz, CDCl<sub>3</sub>)  $\delta$  7.09 (dd, 1H,  $J$  = 8.3, 8.0 Hz), 6.38 (d, 1H,  $J$  = 8.0 Hz), 6.32 (d, 1H,  $J$  = 8.3 Hz), 6.06 (s, 1H), 4.52 (dd, 2H,  $J$  = 6.1, 6.1 Hz), 3.87 (br, 1H), 3.77 (s, 3H), 2.70 (dd, 2H,  $J$  = 6.1, 6.1 Hz); <sup>13</sup>C NMR (126 MHz, CDCl<sub>3</sub>)  $\delta$  164.7, 157.2, 155.7, 143.7, 130.3, 120.0, 112.3, 108.8, 100.6, 66.8, 55.5, 28.5; IR (ATR, cm<sup>-1</sup>) 3464, 3367, 3239, 2942, 2838, 1710, 1621, 1579, 1466, 1438, 1399, 1302, 1254, 1222, 1132, 1081, 1045, 880; MS (FAB)  $m/z$  220 [M+H]<sup>+</sup>; HRMS calcd for C<sub>12</sub>H<sub>14</sub>NO<sub>3</sub> [M+H]<sup>+</sup> 220.0974; Found:  $m/z$  220.0974; Anal. Calcd for C<sub>12</sub>H<sub>13</sub>NO<sub>3</sub>: C, 65.74; H, 5.98; N, 6.39. Found: C, 65.58; H, 6.00; N, 6.31.

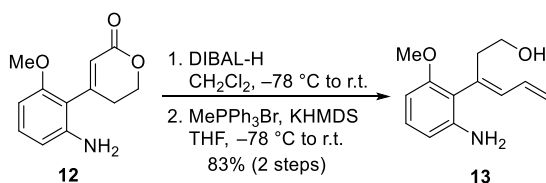

#### (*E*)-Dienylalcohol **13**:

To a solution of aniline **12** (810.0 mg, 3.69 mmol) in CH<sub>2</sub>Cl<sub>2</sub> (70.0 mL) was added DIBAL-H (1M in toluene, 7.4 mL, 7.40 mmol) at -78 °C. The solution was stirred for 1 h. After addition of saturated aqueous Na/K tartrate, the mixture was stirred vigorously at room temperature for 1 h. The mixture was extracted with EtOAc, washed with brine and dried over Na<sub>2</sub>SO<sub>4</sub>. Concentration under reduced pressure gave the crude acetal.

To a suspension of MePPh<sub>3</sub>Br (4.60 g, 12.9 mmol) in anhydrous THF (30.0 mL) was added KHMDS (0.5 M in THF, 22.2 mL, 11.1 mmol), and the suspension was stirred at 0 °C for 1 h. To

the suspension was added the above acetal in anhydrous THF (7.0 mL) via cannula. After the reaction mixture was stirred for 2 h at room temperature, it was quenched with water, extracted with EtOAc, washed with brine and dried over Na<sub>2</sub>SO<sub>4</sub>. After concentration under reduced pressure, purification by flash column chromatography on silica gel (10-60% EtOAc/hexane) gave (*E*)-dienylalcohol **13** (672.4 mg, 83% in 2 steps) as a yellow oil; <sup>1</sup>H NMR (500 MHz, CDCl<sub>3</sub>) δ 7.05 (dd, 1H, *J* = 8.3, 8.0 Hz), 6.85 (ddd, 1H, *J* = 16.6, 10.9, 10.3 Hz), 6.41-6.36 (m, 2H), 6.17 (d, 1H, *J* = 11.2 Hz), 5.25 (dd, 1H, *J* = 16.9, 1.1 Hz), 5.22 (dd, 2H, *J* = 12.9, 1.1 Hz), 3.76 (s, 3H), 3.76 (br, 1H), 3.59-3.57 (m, 2H), 2.80-2.65 (m, 2H); <sup>13</sup>C NMR (126 MHz, CDCl<sub>3</sub>) δ 157.4, 144.4, 134.4, 133.9, 132.5, 128.4, 118.4, 117.8, 109.0, 101.3, 60.9, 55.6, 34.3; IR (ATR, cm<sup>-1</sup>) 3370, 2955, 1714, 1584, 1466, 1437, 1253, 1130, 1092, 1047, 909; MS (FAB) *m/z* 220 [M+H]<sup>+</sup>; HRMS calcd for C<sub>13</sub>H<sub>18</sub>NO<sub>2</sub> [M+H]<sup>+</sup> 220.1338; Found: *m/z* 220.1340.

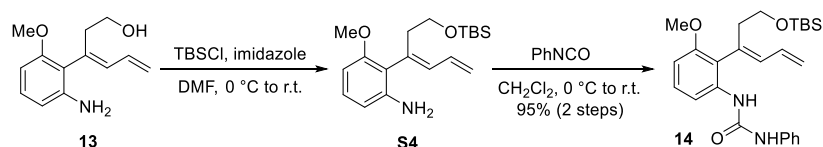

#### (*E*)-Dienylurea **14**:

To a solution of (*E*)-dienylalcohol **13** (649.1 mg, 2.96 mmol) in anhydrous DMF (30.0 mL) were added TBSCl (535.0 mg, 3.55 mmol) and imidazole (302.1 mg, 4.44 mmol) at 0 °C, and the solution was stirred at room temperature for 8 h. After addition of water to the reaction solution, the mixture was extracted with Et<sub>2</sub>O. The combined organic layers were washed with brine and dried over Na<sub>2</sub>SO<sub>4</sub>. After concentration under reduced pressure, purification by flash column chromatography on silica gel (10-30% EtOAc/hexane) gave a mixture including desired (*E*)-dienylsilyl ether **S4**.

To a solution of the above (*E*)-dienylsilyl ether **S4** in CH<sub>2</sub>Cl<sub>2</sub> (30.0 mL) was added phenyl isocyanate (406.0 μL, 3.74 mmol) at 0 °C, and the solution was stirred at room temperature for 6 h. The reaction solution was then concentrated under reduced pressure. The resultant residue was purified by flash column chromatography on silica gel (10-30% EtOAc/hexane) to give (*E*)-dienylurea **14** (1.27 g, 95% in 2 steps) as a white solid; mp. 156.5-160.3 °C (hexane/EtOAc); <sup>1</sup>H NMR (500 MHz, CDCl<sub>3</sub>) δ 7.68 (d, 1H, *J* = 8.3 Hz), 7.32-7.13 (m, 5H), 7.09-6.94 (m, 2H), 6.58 (d, 1H, *J* = 7.4 Hz), 6.44 (br, 1H), 6.21 (d, 1H, *J* = 10.9 Hz), 5.93 (ddd, 1H, *J* = 17.0, 10.0, 10.0 Hz), 5.13 (dd, 1H, *J* = 17.0, 1.7 Hz), 4.93 (dd, *J* = 10.0, 1.7 Hz, 1H), 3.70 (s, 3H), 3.61 (ddd, 1H, *J* = 10.0, 6.0, 4.5 Hz), 3.45 (ddd, 1H, *J* = 12.5, 7.5, 3.1 Hz), 2.54 (ddd, 1H, *J* = 13.8, 13.8, 4.3 Hz), 2.44 (ddd, 1H, 13.8, 9.0, 6.0 Hz), 0.83 (s, 9H), 0.012 (s, 3H), 0.008 (s, 3H); <sup>13</sup>C NMR (126 MHz, CDCl<sub>3</sub>) δ 156.7, 152.8, 138.1, 137.4, 134.1, 133.4, 132.6, 129.0, 128.8, 123.8, 121.0, 118.2, 118.0, 113.3, 105.6, 61.6, 55.7, 40.9, 26.0, 18.5, -5.0, -5.2; IR (ATR, cm<sup>-1</sup>) 3331, 2954, 2856, 1657, 1598,



1551, 1466, 1436, 1315, 1294, 1246, 1088; Anal. Calcd for C<sub>26</sub>H<sub>36</sub>N<sub>2</sub>O<sub>3</sub>Si: C, 68.99; H, 8.02; N, 6.19. Found: C, 68.79; H, 7.99; N, 6.27.

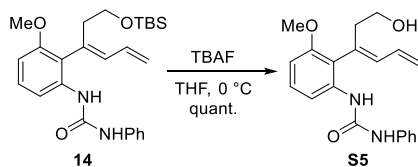

**(E)-Dienylalcohol S5:**

To a solution of (*E*)-dienylurea **14** (200.0 mg, 0.442 mmol) in THF (4.4 mL) was added TBAF (1M in THF, 0.5mL, 0.486 mmol) at 0 °C. The solution was stirred at 0 °C for 2 h. After addition of saturated aqueous NH<sub>4</sub>Cl, the mixture was extracted with EtOAc, washed with brine and dried over Na<sub>2</sub>SO<sub>4</sub>. After concentration under reduced pressure, the resultant residue was purified by flash column chromatography on silica gel (10-60% EtOAc/hexane) to give (*E*)-dienylalcohol **S5** (149.0 mg, quant.) as a white solid; <sup>1</sup>H NMR (500 MHz, CDCl<sub>3</sub>) δ 7.73 (d, 1H, *J* = 8.3 Hz), 7.41 (br, 1H), 7.29-7.19 (m, 6H), 7.04 (dd, 1H, *J* = 7.2, 7.2 Hz), 6.73 (ddd, 1H, *J* = 16.6, 10.8, 10.3 Hz), 6.59 (d, 1H, *J* = 8.3 Hz), 6.10 (d, 1H, *J* = 10.8 Hz), 5.22 (d, 1H, *J* = 17.2 Hz), 5.20 (d, 1H, *J* = 10.3 Hz), 3.75 (s, 3H), 3.62 (m, 1H), 3.45 (m, 1H), 2.73 (m, 1H), 2.59-2.55 (m, 2H); <sup>13</sup>C NMR (126 MHz, CDCl<sub>3</sub>) δ 156.9, 153.5, 138.1, 137.5, 135.1, 133.0, 132.2, 129.1, 128.6, 123.8, 121.6, 121.0, 119.2, 113.3, 105.4, 60.4, 55.7, 34.2; IR (ATR, cm<sup>-1</sup>) 3341, 2960, 2246, 1665, 1588, 1549, 1466, 1436, 1314, 1246, 1097, 1040, 907; Anal. Calcd for C<sub>20</sub>H<sub>22</sub>N<sub>2</sub>O<sub>3</sub>: C, 70.99; H, 6.55; N, 8.28. Found: C, 70.82; H, 6.65; N, 8.21.

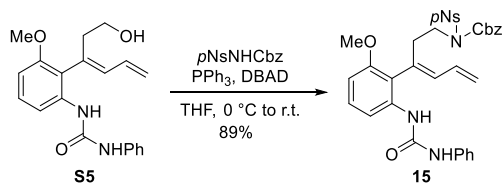

**(E)-Dienylurea 15:**

To a solution of (*E*)-dienylalcohol **S5** (215.4 mg, 0.637 mmol), *p*NsNHCBz (428.5 g, 1.27 mmol) and PPh<sub>3</sub> (334.2 mg, 1.27 mmol) in THF (6.0 mL) was added a solution of DBAD (293.4 mg, 1.27 mmol) in THF (1.0 mL) at 0 °C. The solution was stirred at room temperature for 3 h. After addition of saturated aqueous NH<sub>4</sub>Cl, the mixture was extracted with EtOAc. The combined organic layers were washed with brine and dried over Na<sub>2</sub>SO<sub>4</sub>. After concentration under reduced pressure, the resultant residue was purified by flash column chromatography on silica gel (5-30% EtOAc/hexane) to give (*E*)-dienylurea **15** (372.4 mg, 89%) as a yellow solid; <sup>1</sup>H NMR (500 MHz, CDCl<sub>3</sub>) δ 8.02 (d, 2H, *J* = 8.9 Hz), 7.82 (d, 2H, *J* = 8.9 Hz), 7.76 (d, 1H, *J* = 8.3 Hz), 7.36-7.21 (m, 10H), 7.08 (d, 2H, *J* = 7.4 Hz), 7.02 (dd, 1H, *J* = 7.4, 7.2 Hz), 6.71 (ddd, 1H, *J* = 16.6, 10.6,

10.6 Hz), 6.62 (d, 1H,  $J = 8.3$  Hz), 6.05 (d, 1H,  $J = 10.9$  Hz), 5.22 (d, 1H,  $J = 16.9$  Hz), 5.18 (d, 1H,  $J = 10.3$  Hz), 5.01 (s, 2H), 3.88-3.85 (m, 2H), 3.74 (s, 3H), 3.00-2.85 (m, 2H);  $^{13}\text{C}$  NMR (126 MHz,  $\text{CDCl}_3$ )  $\delta$  157.0, 153.2, 151.9, 150.2, 144.3, 138.1, 136.6, 134.6, 133.5, 132.0, 131.9, 129.3, 129.2, 129.0, 128.8, 128.7, 128.6, 123.9, 123.8, 121.8, 120.7, 119.9, 113.6, 105.8, 69.7, 55.5, 46.5, 33.0; IR (ATR,  $\text{cm}^{-1}$ ) 3369, 2977, 2917, 2252, 1733, 1665, 1588, 1533, 1468, 1437, 1350, 1236, 1171, 1089, 897; MS (FAB)  $m/z$  657  $[\text{M}+\text{H}]^+$ ; HRMS calcd for  $\text{C}_{34}\text{H}_{33}\text{N}_4\text{O}_8\text{S}$   $[\text{M}+\text{H}]^+$  657.2019; Found:  $m/z$  657.2022.

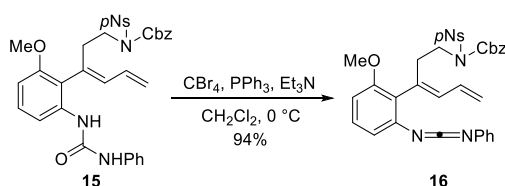

#### (E)-Dienylcarbodiimide **16**:

To a solution of (E)-dienylurea **15** (28.0 mg, 0.0426 mmol) and  $\text{PPh}_3$  (22.4 mg, 0.0852 mmol) in  $\text{CH}_2\text{Cl}_2$  (1.0 mL) were added  $\text{Et}_3\text{N}$  (24.0  $\mu\text{L}$ , 0.170 mmol) and  $\text{CBr}_4$  (28.3 mg, 0.0852 mmol) at  $0^\circ\text{C}$ . The reaction solution was stirred at  $0^\circ\text{C}$  for 2 h. The resultant solution was then concentrated under reduced pressure. The obtained residue was purified by flash column chromatography on neutral silica gel (10-30%  $\text{EtOAc}$ /hexane) to give (E)-dienylcarbodiimide **16** (25.7 mg, 94%) as a yellow solid. The product was not stable, thus it was used for the next reaction immediately;  $^1\text{H}$  NMR (500 MHz,  $\text{CDCl}_3$ )  $\delta$  8.14 (d, 2H,  $J = 8.9$  Hz), 7.92 (d, 2H,  $J = 8.9$  Hz), 7.35-7.27 (m, 5H), 7.21 (dd, 1H,  $J = 8.3$ , 8.0 Hz), 7.17-7.09 (m, 5H), 6.86 (d, 1H,  $J = 8.0$  Hz), 6.72 (d, 1H,  $J = 8.3$  Hz), 6.69 (ddd, 1H,  $J = 16.6$ , 10.6, 10.6 Hz), 6.10 (d, 1H,  $J = 11.2$  Hz), 5.21 (dd, 1H,  $J = 16.9$ , 1.7 Hz), 5.13 (dd, 1H,  $J = 10.0$ , 1.7 Hz), 5.03 (s, 2H), 3.94 (dd, 2H,  $J = 8.3$ , 8.3 Hz), 3.77 (s, 3H), 2.94 (dd, 2H,  $J = 8.6$ , 8.6 Hz);  $^{13}\text{C}$  NMR (126 MHz,  $\text{CDCl}_3$ )  $\delta$  157.7, 151.6, 150.2, 144.7, 138.6, 136.9, 134.4, 133.9, 133.2, 131.9, 131.2, 129.5, 129.4, 128.8, 128.6, 128.6, 128.5, 127.0, 125.2, 124.1, 123.7, 119.4, 117.4, 107.9, 69.3, 55.7, 46.3, 33.0; IR (ATR,  $\text{cm}^{-1}$ ) 2919, 2138, 1733, 1578, 1532, 1467, 1352, 1264, 1234, 1171, 1088, 889; MS (FAB)  $m/z$  639  $[\text{M}+\text{H}]^+$ ; HRMS calcd for  $\text{C}_{34}\text{H}_{31}\text{N}_4\text{O}_7\text{S}$   $[\text{M}+\text{H}]^+$  639.1913; Found:  $m/z$  639.1911.

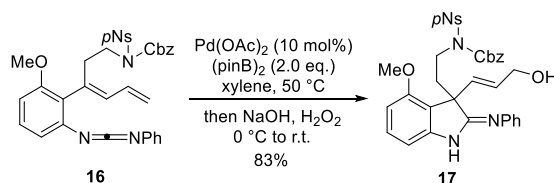

#### 2-Iminoindoline **17**:

To a solution of (E)-dienylcarbodiimide **16** (165.0 mg, 0.258 mmol) in anhydrous xylene (4.0 mL) were added bis(pinacolato)diboron (131.0 mg, 0.518 mmol) and  $\text{Pd}(\text{OAc})_2$  (5.8 mg, 0.0258

mmol) at room temperature, and the reaction atmosphere was replaced by the Ar atmosphere. The mixture was then stirred at 50 °C for 13 h. After the mixture was cooled to 0 °C, 1M aqueous NaOH (1.6 mL, 1.55 mmol) and 30% H<sub>2</sub>O<sub>2</sub> (175.0 μL, 1.55 mmol) were added to the reaction mixture. The mixture was stirred at room temperature for additional 1 h. After addition of saturated aqueous NH<sub>4</sub>Cl, the mixture was extracted with EtOAc. The combined organic layers were washed with brine and dried over Na<sub>2</sub>SO<sub>4</sub>. After concentration under reduced pressure, the resultant residue was purified by flash column chromatography on silica gel (5-60% EtOAc/hexane) to give 2-iminoindoline **17** (141.0 mg, 83%) as a yellow oil; (mixture of isomer of amidine) <sup>1</sup>H NMR (500 MHz, DMSO) δ 9.42 (s, 0.15H, minor), 9.36 (s, 1H, major), 8.27 (d, 0.30H, *J* = 8.9 Hz, minor), 8.23 (d, 2H, *J* = 8.9 Hz, major), 8.07 (d, 0.30H, *J* = 8.9 Hz, minor), 8.01 (d, 2H, *J* = 8.9 Hz, major), 8.00 (d, 2H, *J* = 7.7 Hz, major), 7.34 (dd, 2.30H, *J* = 8.0, 7.8 Hz, major + minor), 7.28-7.23 (m, 1.30H, major + minor), 7.20 (dd, 3H, *J* = 7.8, 7.7 Hz, major), 7.15 (d, 0.30H, *J* = 6.8 Hz, minor), 7.11 (dd, 0.15H, *J* = 8.3, 8.0 Hz, minor), 7.03-6.97 (m, 3.30H, major + minor), 6.90 (d, 0.30H, *J* = 7.7 Hz, minor), 6.87 (d, 1H, *J* = 7.8 Hz, major), 6.66 (d, 1H, *J* = 8.3 Hz, major), 6.56 (d, 0.15H, *J* = 8.3 Hz), 6.48 (d, 0.15H, *J* = 7.7 Hz, minor), 6.00 (d, 1H, *J* = 15.5 Hz, major), 5.89 (d, 0.15H, *J* = 15.5 Hz, minor), 5.63 (ddd, 0.15H, *J* = 15.4, 4.9, 4.8 Hz, minor), 5.43 (ddd, 1H, *J* = 15.5, 4.9, 4.6 Hz, major), 5.08-5.03 (m, 1.30H, major + minor), 4.96 (d, 1H, *J* = 12.4 Hz, major), 4.75 (dd, 1H, *J* = 5.5, 5.1 Hz, major), 4.70 (dd, 0.15H, *J* = 5.5, 5.4 Hz, minor), 3.91 (dd, 2.30H, *J* = 4.6, 3.7 Hz, major + minor), 3.81-3.73 (m, 0.15H, minor), 3.73 (s, 3.45H, major + minor), 3.59-3.54 (m, 0.15H, minor), 3.36-3.30 (m, 1H, major), 3.24-3.17 (m, 1H, major), 2.77 (ddd, 1H, *J* = 12.3, 12.3, 4.9 Hz, major), 2.59 (ddd, 1.15H, *J* = 12.1, 12.0, 4.0 Hz, major + minor), 2.40-2.35 (m, 0.15H, minor); <sup>13</sup>C NMR (126 MHz, DMSO) δ 170.9, 156.9, 155.2, 151.0, 150.1, 144.1, 140.7, 134.6, 130.3, 129.6, 129.3, 128.5, 128.3, 128.0, 126.9, 124.3, 122.1, 121.2, 119.3, 110.5, 105.8, 68.5, 60.9, 59.4, 55.4, 43.3, 32.9; IR (ATR, cm<sup>-1</sup>) 2965, 2361, 1733, 1674, 1606, 1532, 1489, 1444, 1350, 1266, 1237, 1171, 1139, 1090, 1007, 970, 855; MS (FAB) *m/z* 657 [M+H]<sup>+</sup>; HRMS calcd for C<sub>34</sub>H<sub>33</sub>N<sub>4</sub>O<sub>8</sub>S [M+H]<sup>+</sup> 657.2019; Found: *m/z* 657.2027.

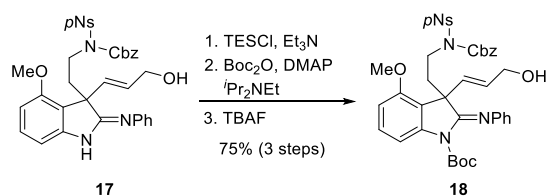

#### *N*-Boc-2-iminoindoline **18**:

To a solution of 2-iminoindoline **17** (102.2 mg, 0.156 mmol) in CH<sub>2</sub>Cl<sub>2</sub> (2.0 mL) were added Et<sub>3</sub>N (82.0 μL, 0.588 mmol) and TESCl (65.8 μL, 0.392 mmol) at 0 °C. The solution was stirred at room temperature for 4 h. After addition of water, the mixture was extracted with EtOAc. The

combined organic layers were washed with brine and dried over Na<sub>2</sub>SO<sub>4</sub>. After concentration under reduced pressure, the resultant residue was purified by short column chromatography on neutral silica gel (10-30% EtOAc/hexane) to give a mixture including a desired silylether.

To a solution of the above mixture in CH<sub>2</sub>Cl<sub>2</sub> (2.0 mL) were added DIPEA (137.0  $\mu$ L, 0.784 mmol), Boc<sub>2</sub>O (128.3 mg, 0.588 mmol) and DMAP (23.9 mg, 0.196 mmol) at 0 °C. The solution was stirred at room temperature for 3 h. After concentration under reduced pressure, the resultant residue was purified by short column chromatography on silica gel (5-30% EtOAc/hexane) to give a mixture including the desired *N*-Boc-2-iminoindoline.

To a solution of the above *N*-Boc iminoindoline in THF (1.3 mL) was added TBAF (1M in THF, 139.0  $\mu$ L, 0.139 mmol) at 0 °C. The solution was stirred at 0 °C for 15 min. After addition of saturated aqueous NH<sub>4</sub>Cl, the mixture was extracted with EtOAc. The combined organic layers were washed with brine and dried over Na<sub>2</sub>SO<sub>4</sub>. After concentration under reduced pressure, the resultant residue was purified by flash column chromatography on silica gel (10-40% EtOAc/hexane) to give *N*-Boc-2-iminoindoline **18** (88.8 mg, 75% in 3 steps) as a white solid; <sup>1</sup>H NMR (500 MHz, CDCl<sub>3</sub>)  $\delta$  8.10 (d, 2H, *J* = 8.9 Hz), 7.93 (d, 2H, *J* = 8.9 Hz), 7.33-7.28 (m, 5H), 7.26-7.22 (m, 3H), 7.10-7.02 (m, 5H), 6.71 (dd, 1H, *J* = 3.8, 3.7 Hz), 5.98 (d, 1H, *J* = 15.8 Hz), 5.76 (ddd, 1H, *J* = 15.4, 5.5, 5.1 Hz), 4.95 (d, 1H, *J* = 11.7 Hz), 4.90 (d, 1H, *J* = 11.7 Hz), 4.12 (d, 2H, *J* = 5.2 Hz), 3.84 (s, 3H), 3.81-3.75 (m, 1H), 3.72-3.64 (m, 1H), 2.89 (ddd, 1H, *J* = 12.1, 11.7, 5.4 Hz), 2.55 (ddd, 1H, *J* = 12.3, 12.3, 4.3 Hz), 1.20 (s, 9H); <sup>13</sup>C NMR (126 MHz, CDCl<sub>3</sub>)  $\delta$  155.9, 155.1, 151.6, 150.1, 149.2, 148.7, 144.9, 142.0, 134.2, 131.3, 129.8, 129.6, 129.1, 128.7, 128.7, 128.5, 123.7, 123.6, 120.3, 116.1, 107.2, 106.8, 84.0, 69.1, 63.2, 55.5, 53.9, 44.2, 34.8, 27.5; IR (ATR, cm<sup>-1</sup>) 3454, 2979, 1731, 1693, 1596, 1532, 1489, 1456, 1369, 1348, 1241, 1172, 1149, 1088, 885; MS (FAB) *m/z* 757 [M+H]<sup>+</sup>; HRMS calcd for C<sub>39</sub>H<sub>41</sub>N<sub>4</sub>O<sub>10</sub>S [M+H]<sup>+</sup> 757.2543; Found: *m/z* 757.2541.

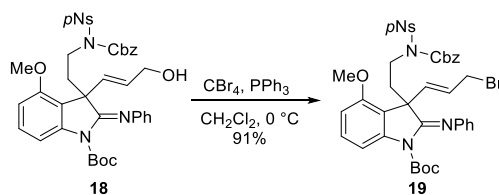

#### Allylbromide **19**:

To a solution of *N*-Boc-2-iminoindoline **18** (104.8 mg, 0.138 mmol) and PPh<sub>3</sub> (90.8 mg, 0.345 mmol) in CH<sub>2</sub>Cl<sub>2</sub> (2.0 mL) was added CBr<sub>4</sub> (91.5 mg, 0.276 mmol) at 0 °C. The reaction solution was stirred at 0 °C for 30 min. After addition of water, the mixture was extracted with EtOAc. The combined organic layers were dried over Na<sub>2</sub>SO<sub>4</sub>. After concentration under reduced pressure, the resultant residue was purified by flash column chromatography on silica gel (10-30%

EtOAc/hexane) to give allylbromide **19** (102.9 mg, 91%) as a white solid;  $^1\text{H}$  NMR (500 MHz,  $\text{CDCl}_3$ )  $\delta$  8.10 (d, 2H,  $J = 9.2$  Hz), 7.92 (d, 2H,  $J = 8.9$  Hz), 7.34-7.28 (m, 5H), 7.27-7.22 (m, 2H), 7.10-7.03 (m, 5H), 6.72 (dd, 1H,  $J = 7.1, 2.0$  Hz), 6.00 (d, 1H,  $J = 15.2$  Hz), 5.79 (ddd, 1H,  $J = 15.2, 7.7, 7.5$  Hz), 4.94 (d, 1H,  $J = 11.8$  Hz), 4.90 (d, 1H,  $J = 11.8$  Hz), 3.97-3.89 (m, 2H), 3.85 (s, 3H), 3.88 (m, 1H), 3.69 (m, 1H), 2.86 (ddd, 1H,  $J = 12.0, 11.8, 5.7$  Hz), 2.53 (ddd, 1H,  $J = 12.3, 10.6, 4.3$  Hz), 1.19 (s, 9H);  $^{13}\text{C}$  NMR (126 MHz,  $\text{CDCl}_3$ )  $\delta$  155.9, 154.5, 151.5, 150.1, 149.3, 148.5, 144.8, 142.2, 134.7, 134.2, 130.1, 129.6, 129.1, 128.8, 128.7, 128.5, 126.3, 123.8, 123.7, 120.4, 115.5, 107.3, 106.9, 84.0, 69.2, 55.5, 53.8, 44.1, 34.5, 32.4, 27.4; IR (ATR,  $\text{cm}^{-1}$ ) 2975, 2936, 2255, 1730, 1691, 1596, 1532, 1489, 1455, 1347, 1253, 1147, 1087, 1013, 966, 908, 854; MS (FAB)  $m/z$  819  $[\text{M}+\text{H}]^+$ ; HRMS calcd for  $\text{C}_{39}\text{H}_{40}\text{N}_4\text{O}_9\text{S}$   $[\text{M}+\text{H}]^+$  819.1699; Found:  $m/z$  819.1704.

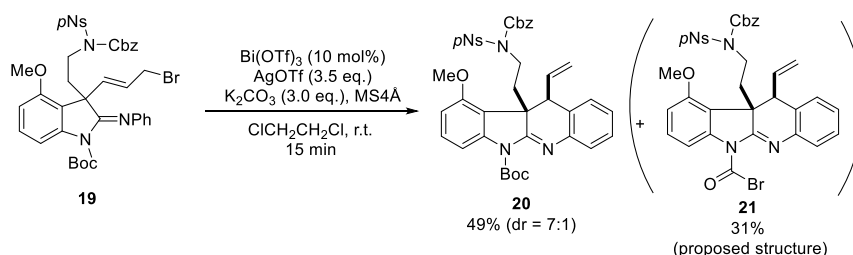

#### Tetracyclic compound **20** and **21**:

A suspension of allylbromide **19** (20.1 mg, 0.0245 mmol),  $\text{Bi}(\text{OTf})_3$  (1.6 mg,  $2.45 \times 10^{-3}$  mmol),  $\text{AgOTf}$  (22.0 mg, 0.0858 mmol),  $\text{MS4A}$  (21.0 mg) and  $\text{K}_2\text{CO}_3$  (10.2 mg, 0.0735 mmol) in  $\text{CH}_2\text{Cl}_2$  (2.5 mL) was stirred at room temperature for 15 min. After addition of water, the mixture was filtered through Celite pad. The filtrate was extracted with EtOAc and dried over  $\text{Na}_2\text{SO}_4$ . After concentration under reduced pressure, the resultant residue was purified by flash column chromatography on silica gel (5-30% EtOAc/hexane) to give a tetracyclic compound **20** (8.9 mg, 49%, dr = 7:1) as a colorless oil and **21** (5.7 mg, 31%) as yellow oil;

Tetracyclic compound **20** (major diastereomer):  $^1\text{H}$  NMR (500 MHz,  $\text{CDCl}_3$ )  $\delta$  8.07 (d, 2H,  $J = 7.7$  Hz), 7.75 (d, 2H,  $J = 7.7$  Hz), 7.52 (d, 1H,  $J = 8.0$  Hz), 7.39 (d, 1H,  $J = 7.8$  Hz), 7.34-7.28 (m, 5H), 7.19-7.16 (m, 2H), 7.09 (d, 2H,  $J = 7.8$  Hz), 6.66 (d, 1H,  $J = 8.3$  Hz), 6.16 (ddd, 1H,  $J = 16.6, 10.6, 9.8$  Hz), 5.35 (d, 1H,  $J = 9.8$  Hz), 5.08 (d, 1H,  $J = 16.6$  Hz), 4.94 (s, 2H), 3.80 (d, 1H,  $J = 10.3$  Hz), 3.68 (s, 3H), 3.61-3.55 (m, 1H), 3.33-3.26 (m, 1H), 2.41-2.35 (m, 1H), 2.14-2.07 (m, 1H), 1.69 (s, 9H);  $^{13}\text{C}$  NMR (126 MHz,  $\text{CDCl}_3$ )  $\delta$  164.8, 156.9, 151.3, 150.2, 149.3, 144.5, 144.3, 143.1, 135.1, 134.8, 134.1, 130.3, 129.7, 128.8, 128.6, 128.5, 128.1, 126.7, 125.7, 125.3, 123.7, 123.7, 117.6, 115.4, 108.0, 107.6, 84.1, 69.2, 54.6, 51.0, 47.4, 44.2, 28.3, 26.3; IR (ATR,  $\text{cm}^{-1}$ ) 2979, 2915, 1733, 1650, 1580, 1533, 1465, 1350, 1282, 1248, 1145, 1070, 890, 859, 747, 627; MS (ESI)  $m/z$  739  $[\text{M}+\text{H}]^+$ ; HRMS calcd for  $\text{C}_{39}\text{H}_{39}\text{N}_4\text{O}_9\text{S}$   $[\text{M}+\text{H}]^+$  739.2438; Found:  $m/z$

739.2427.

Tetracyclic compound **21**:  $^1\text{H}$  NMR (500 MHz,  $\text{CDCl}_3$ )  $\delta$  8.06 (d, 2H,  $J = 8.9$  Hz), 7.80 (d, 2H,  $J = 8.9$  Hz), 7.31-7.23 (m, 5H), 7.20 (d, 1H,  $J = 7.8$  Hz), 7.13 (d, 1H,  $J = 8.0$  Hz), 7.10-7.04 (m, 3H), 6.88 (d, 1H,  $J = 8.0$  Hz), 6.63 (d, 1H,  $J = 8.3$  Hz), 6.22 (ddd, 1H,  $J = 16.9, 10.0, 9.8$  Hz), 5.43 (d, 1H,  $J = 11.4$  Hz), 5.15 (d, 1H,  $J = 16.9$  Hz), 4.95 (dd, 2H,  $J = 12.1, 11.7$  Hz), 3.75 (d, 1H,  $J = 9.8$  Hz), 3.72 (s, 3H), 3.59-3.54 (m, 1H), 3.21 (ddd, 1H,  $J = 12.6, 12.3, 4.6$  Hz), 2.63 (ddd, 1H,  $J = 12.6, 12.3, 4.5$  Hz), 2.25 (ddd, 1H,  $J = 12.6, 12.3, 4.6$  Hz); MS (FAB)  $m/z$  745, 747  $[\text{M}+\text{H}]^+$ . (Compound **21** was too unstable to measure  $^{13}\text{C}$  NMR and IR.

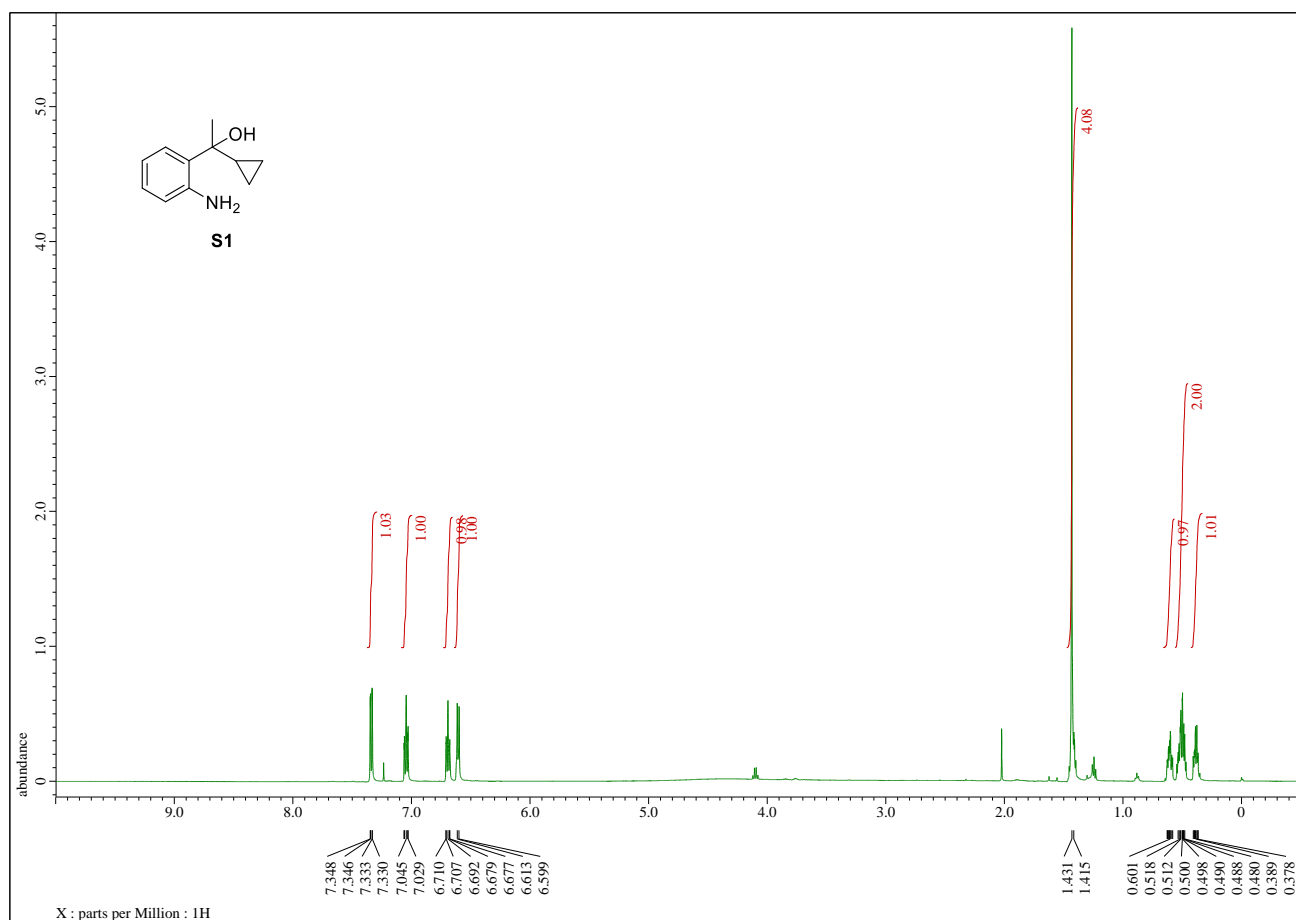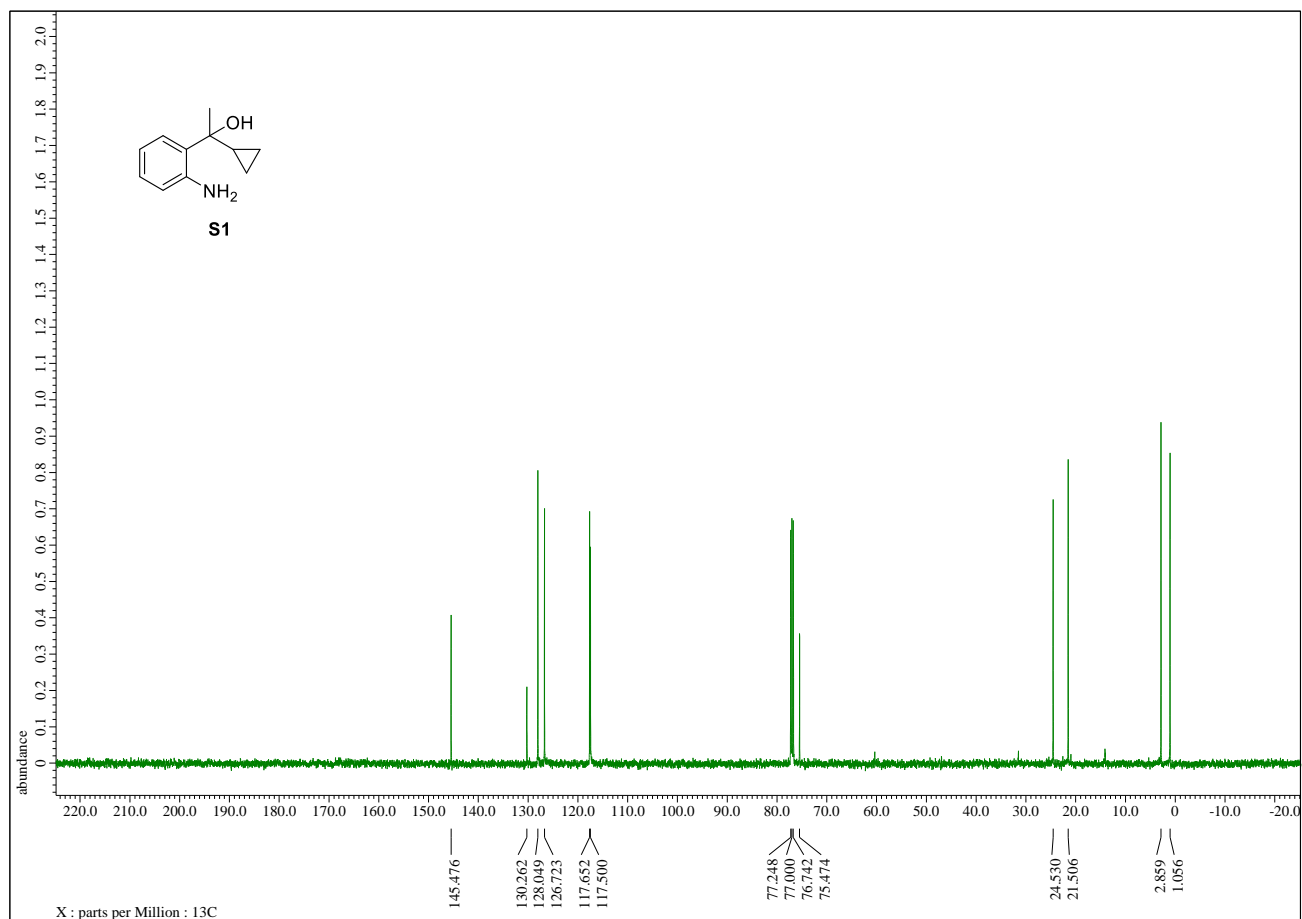

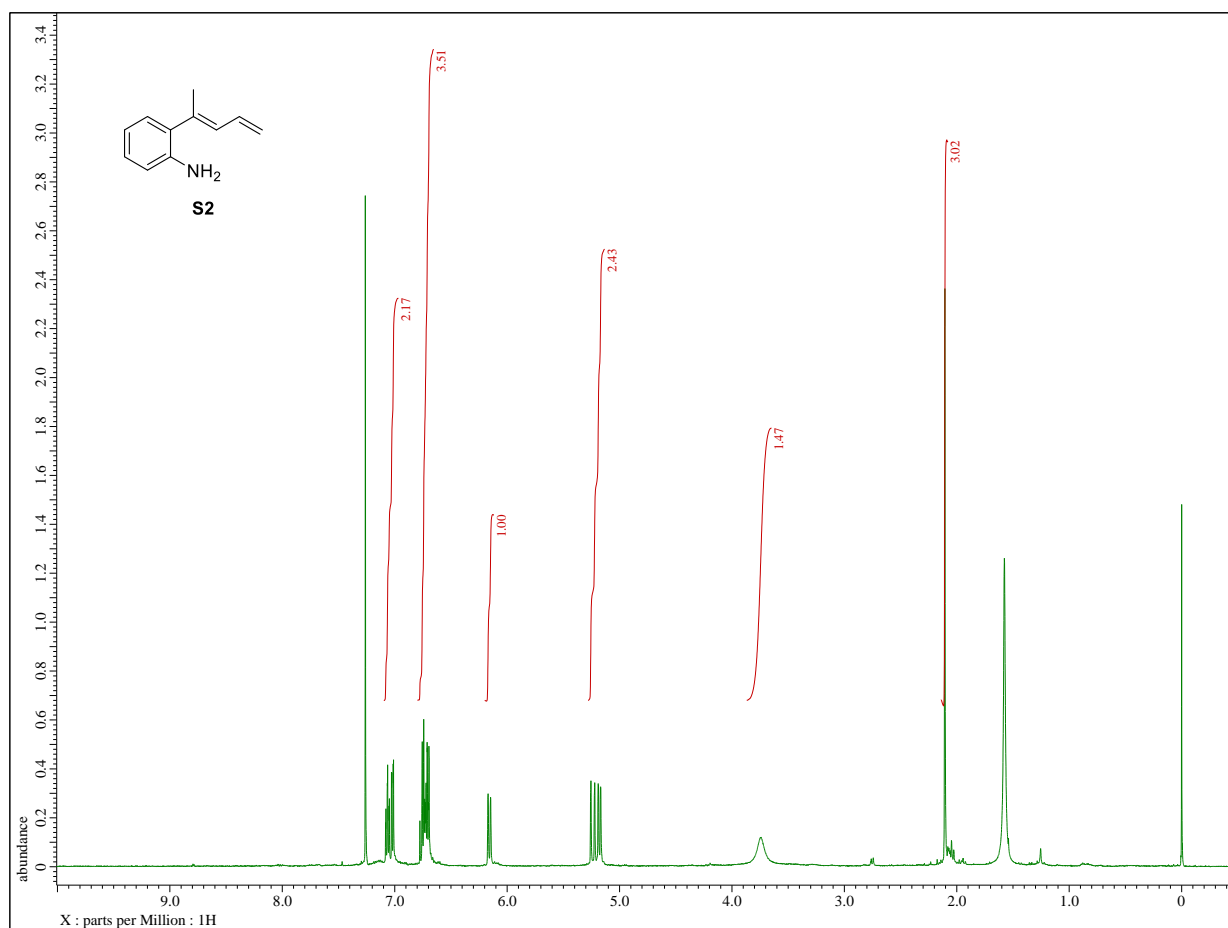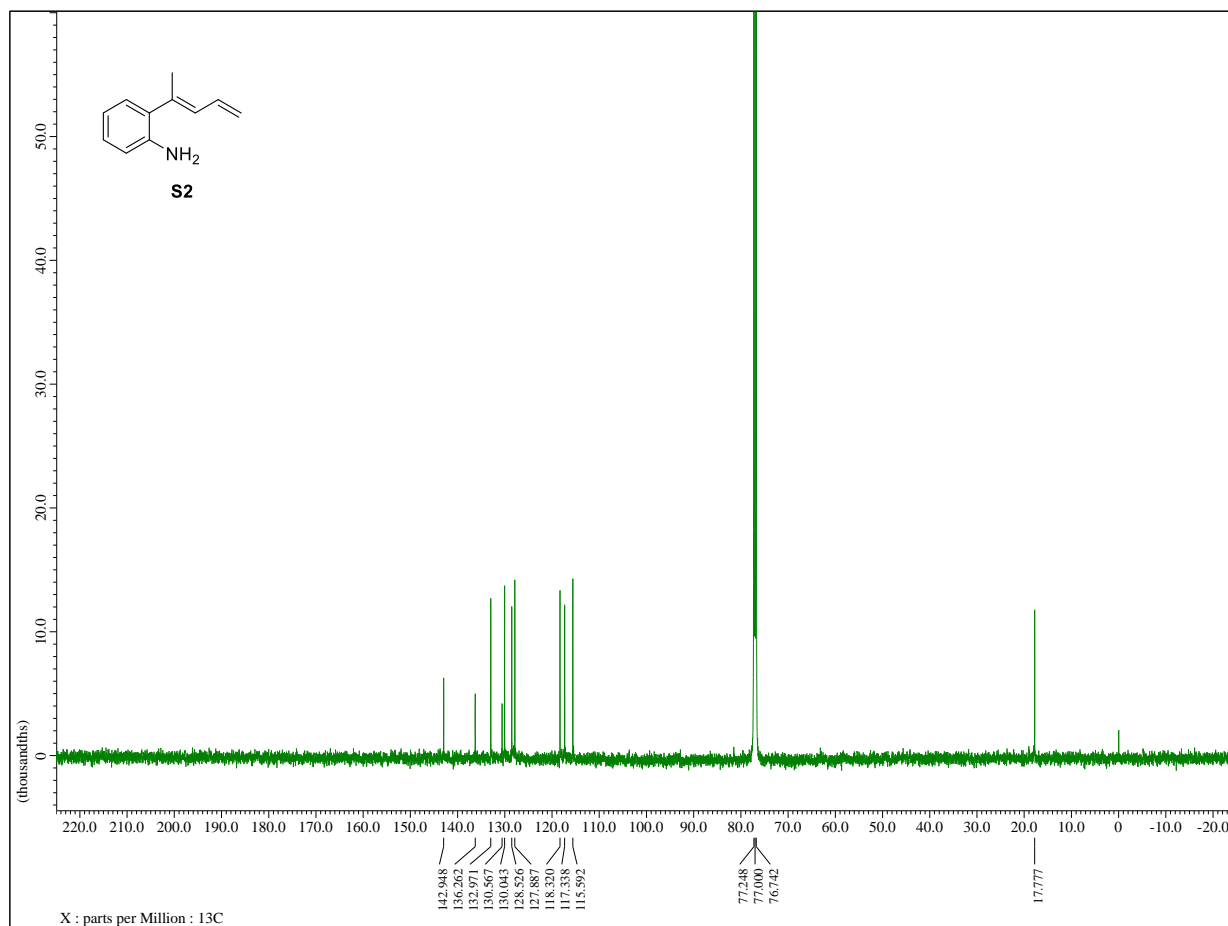



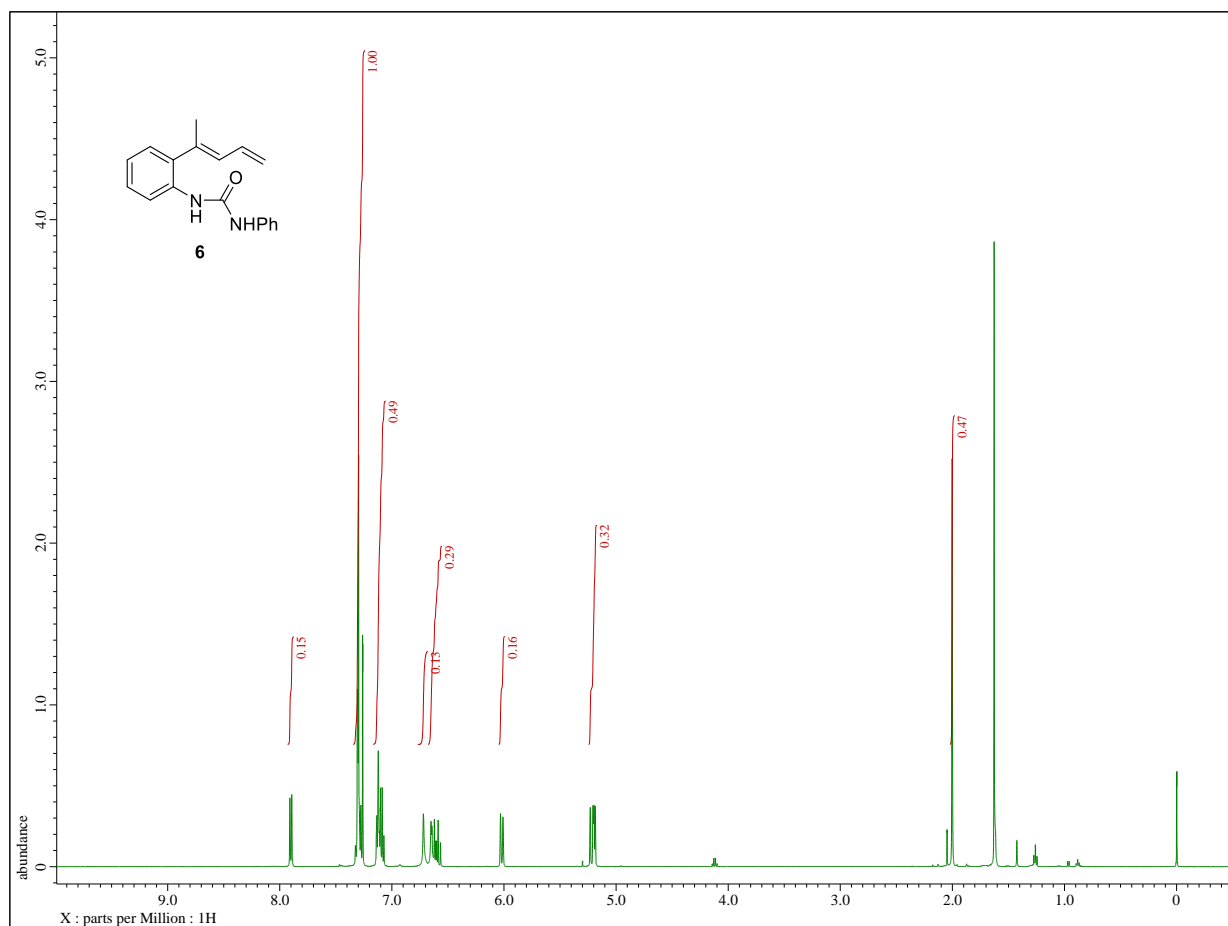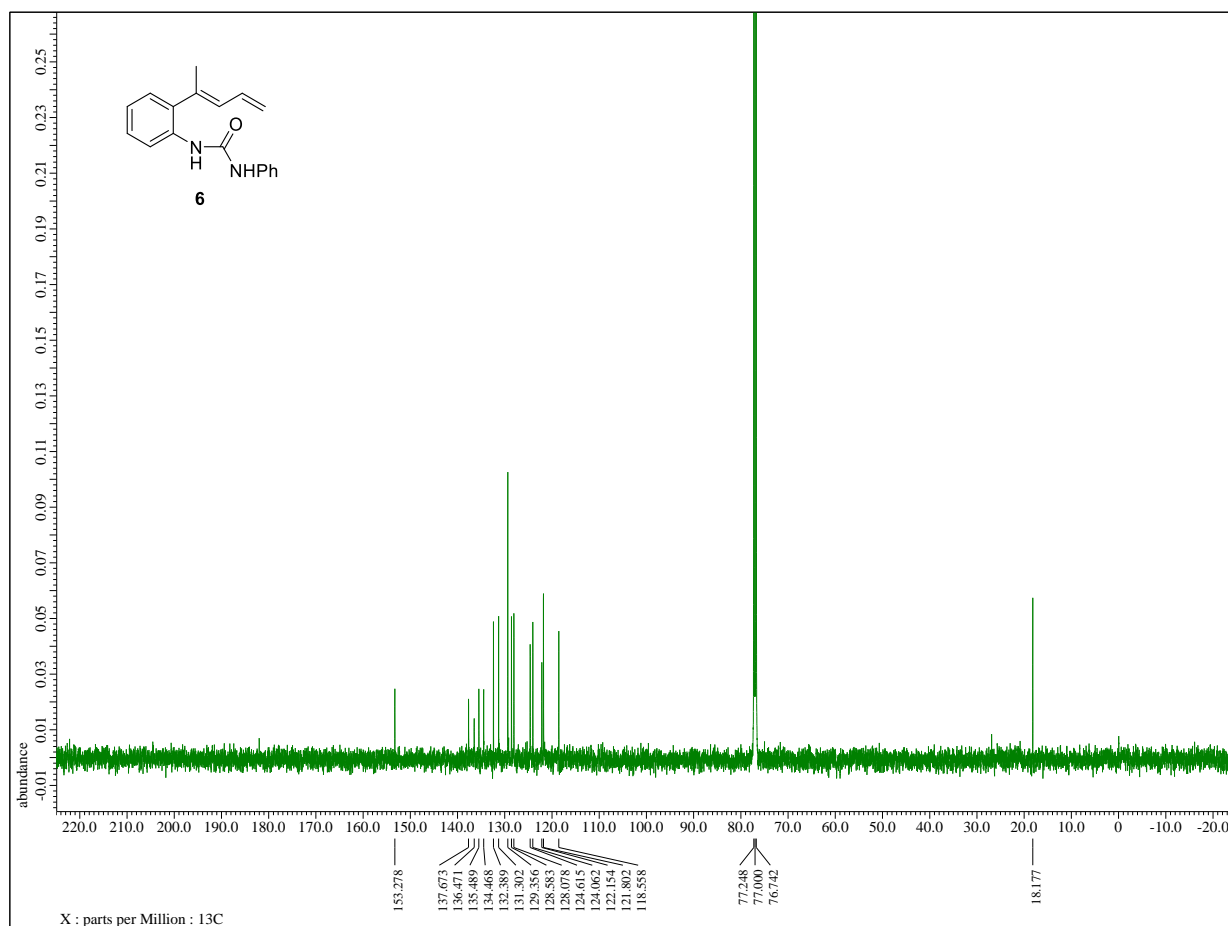

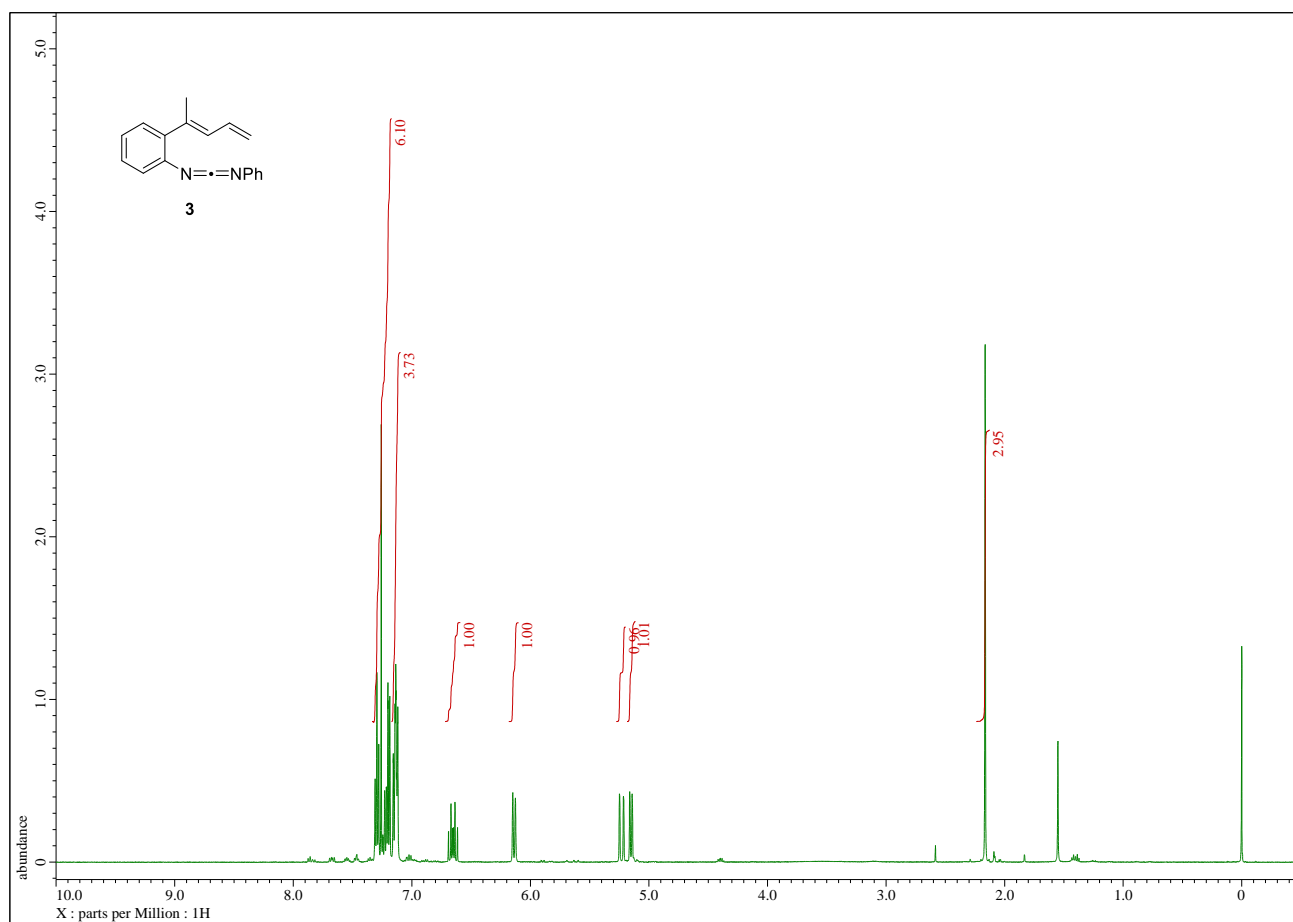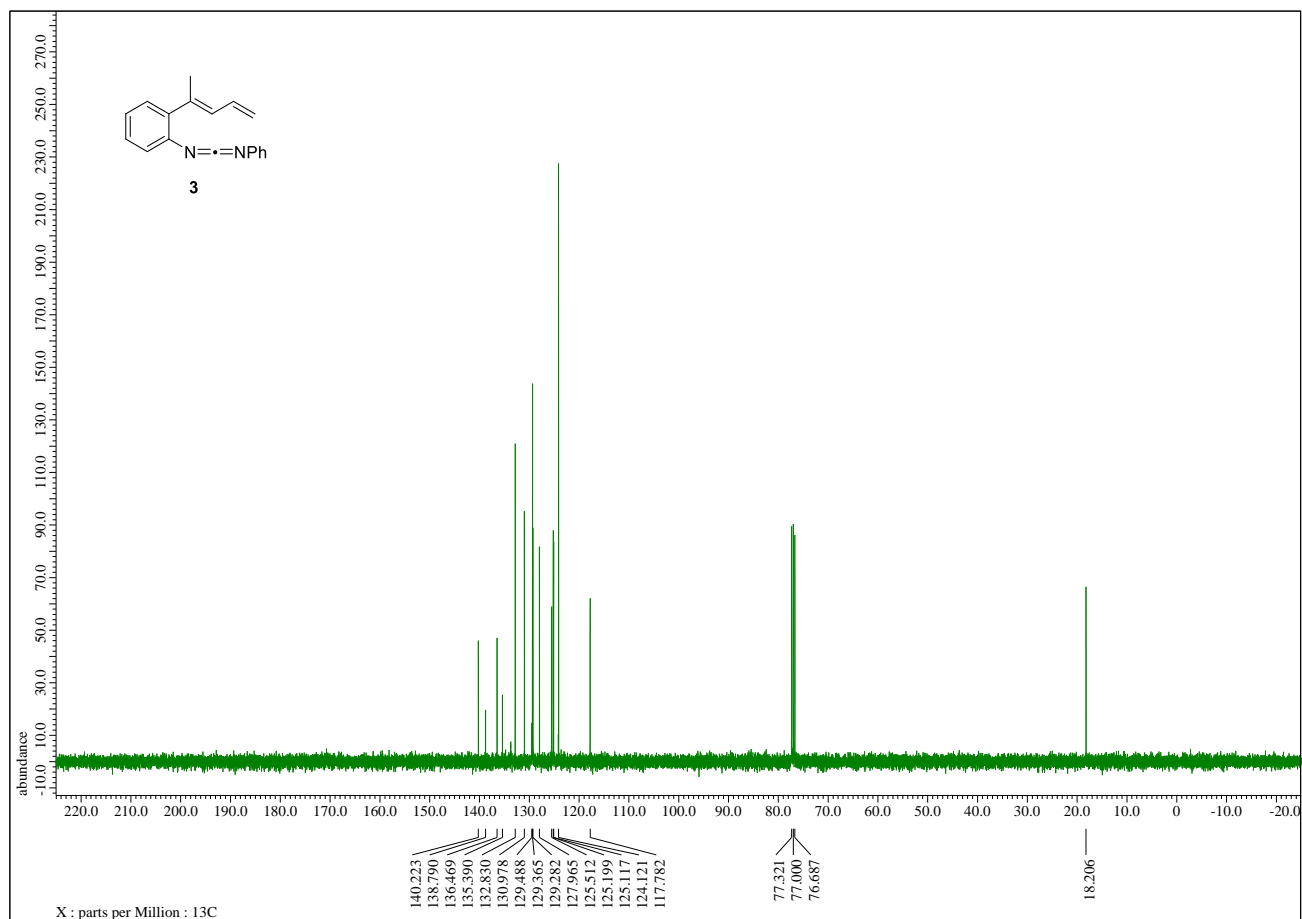

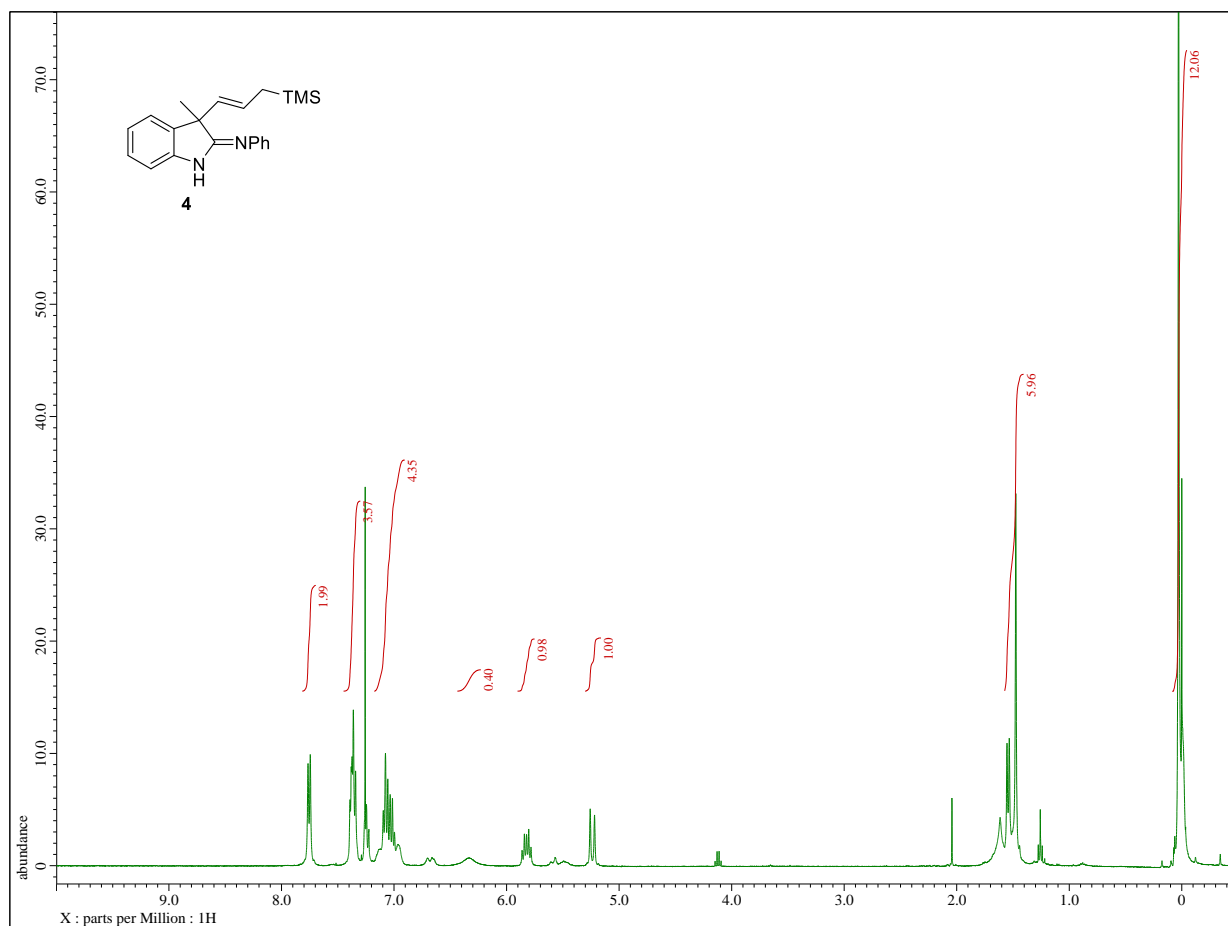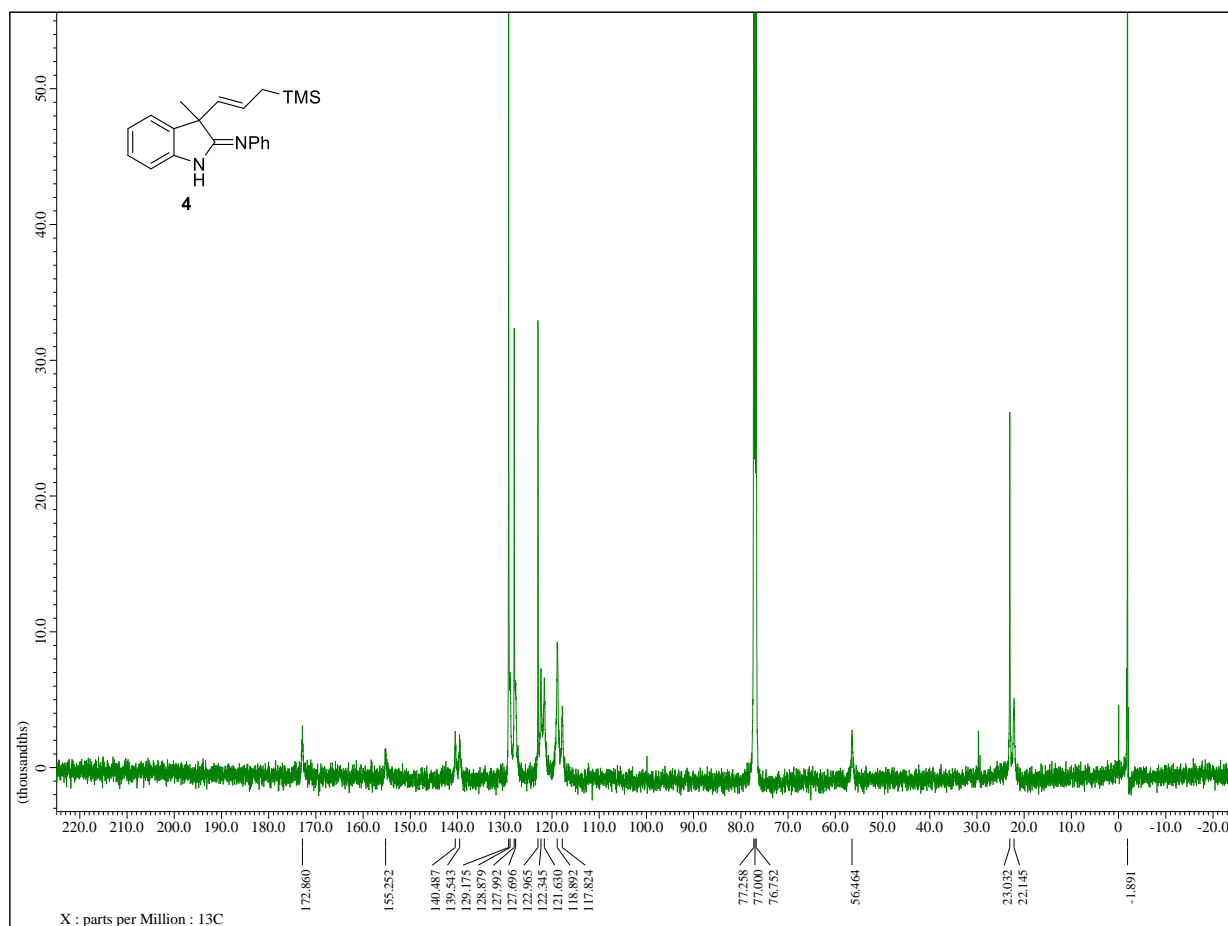

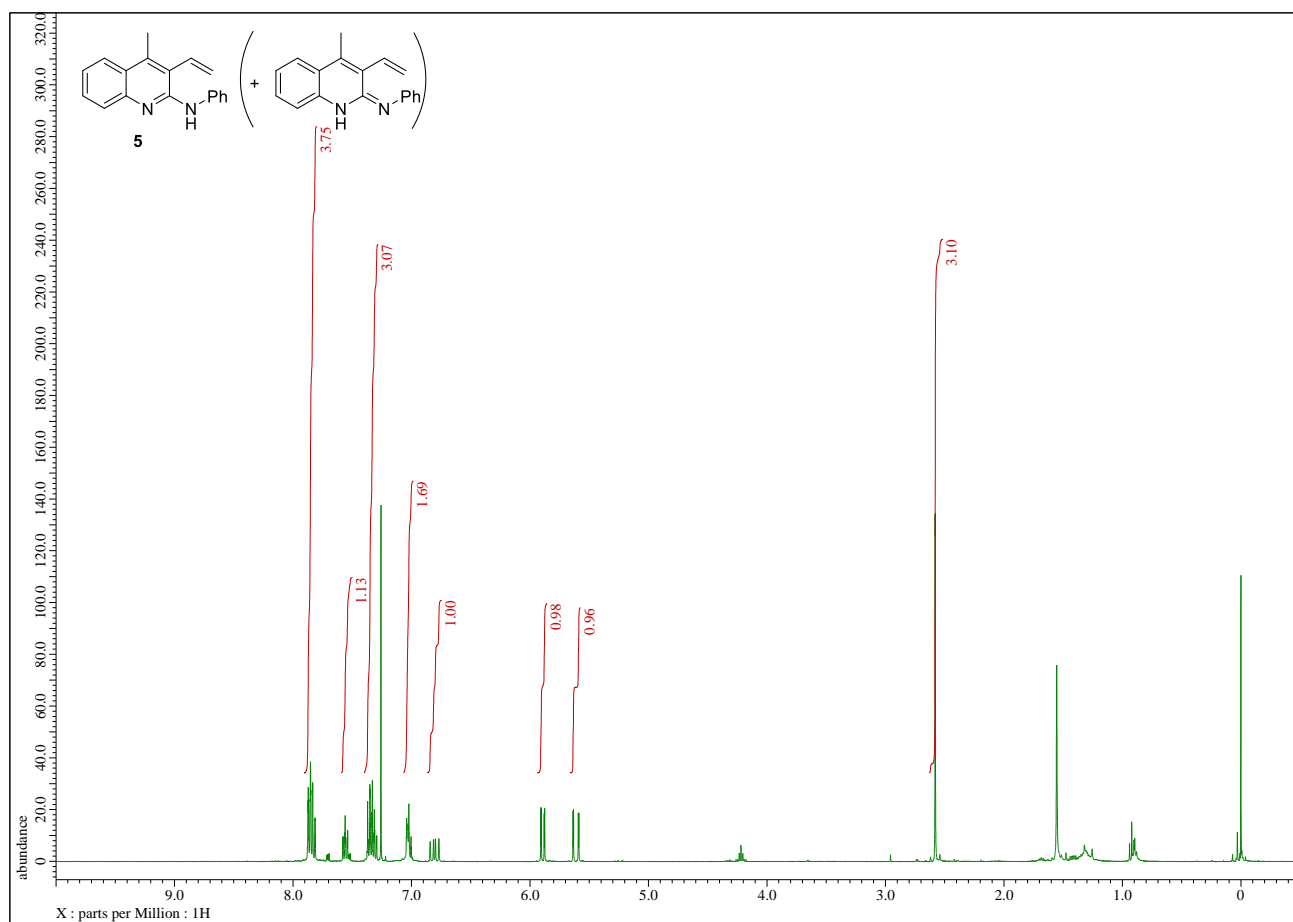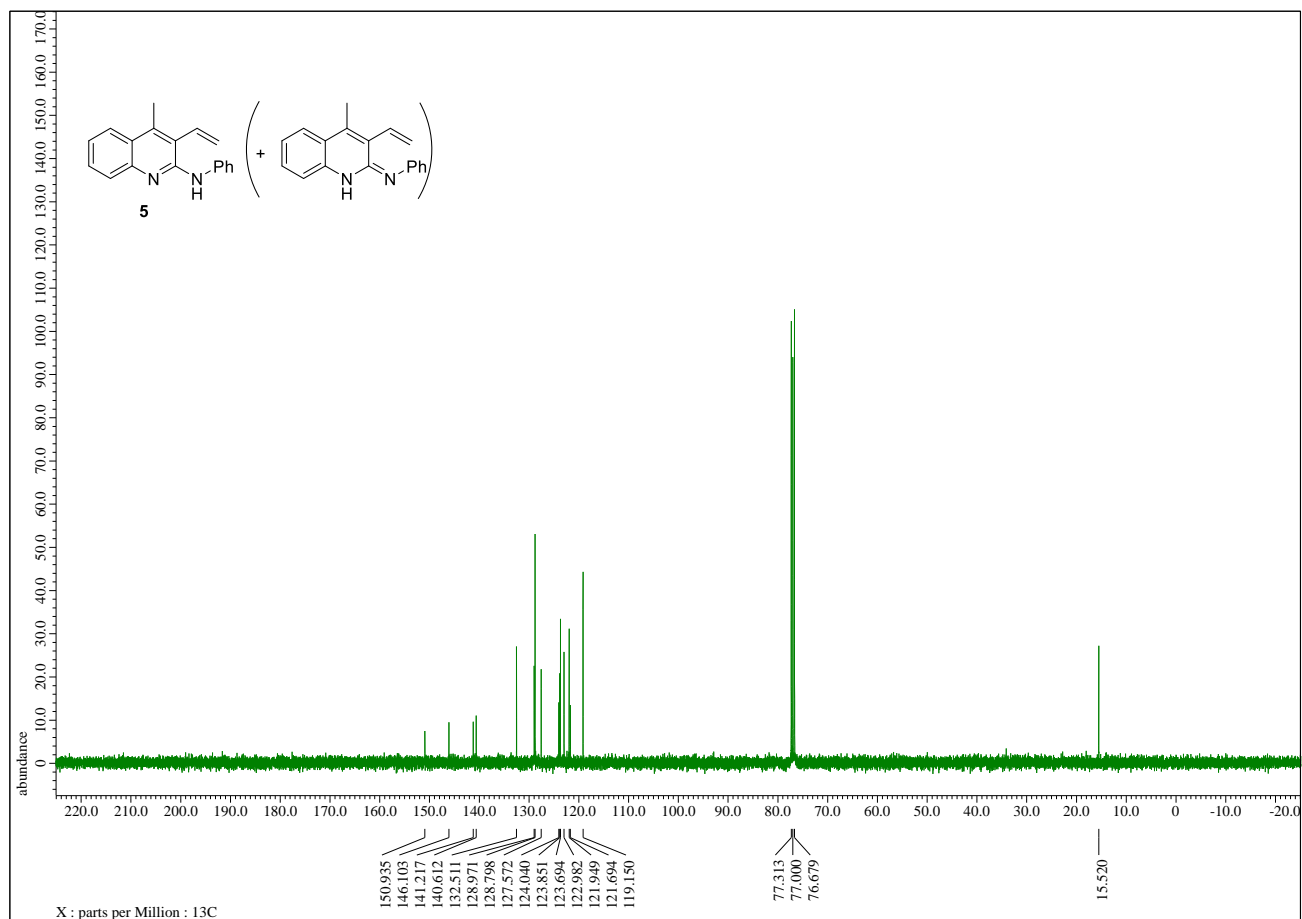

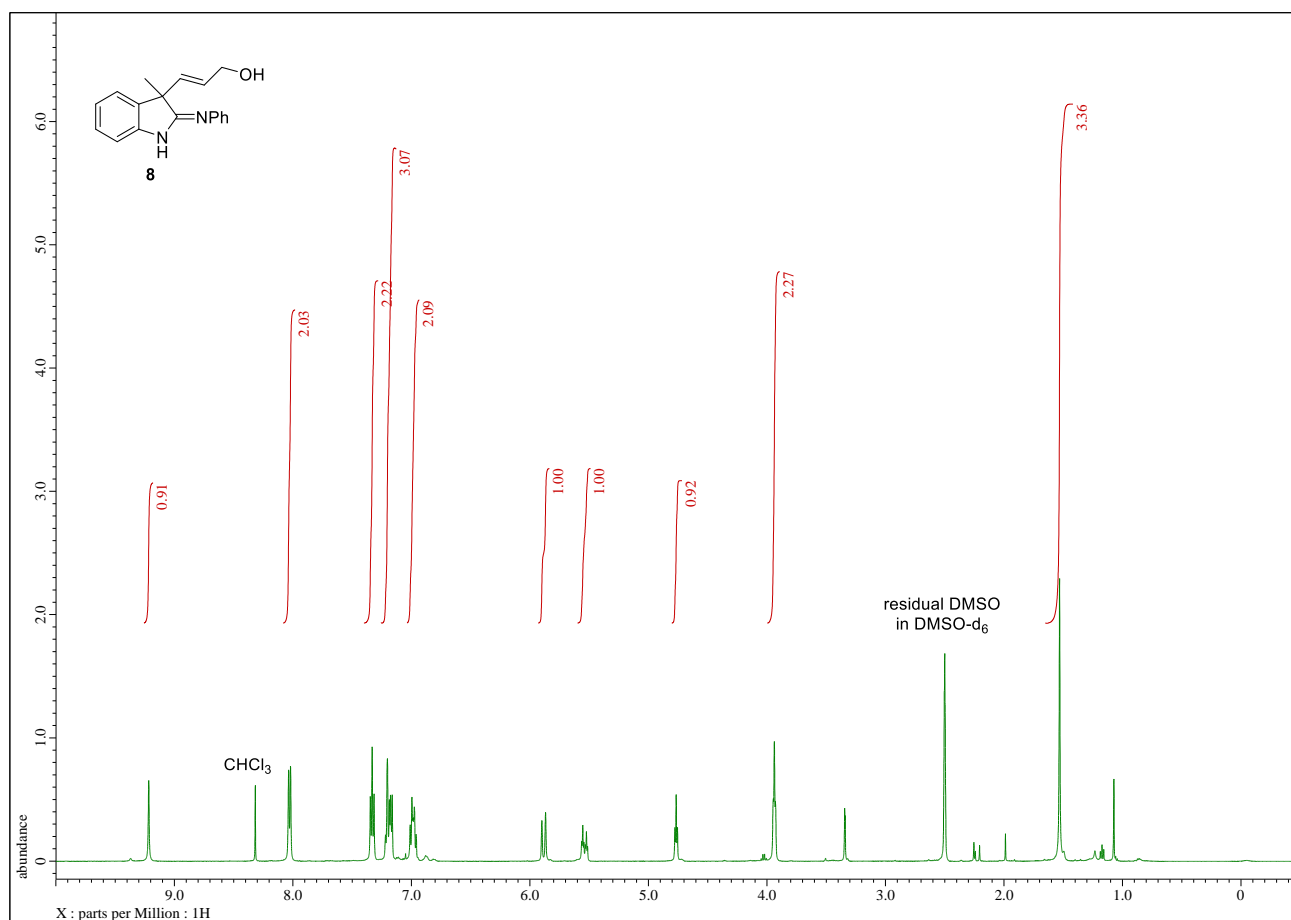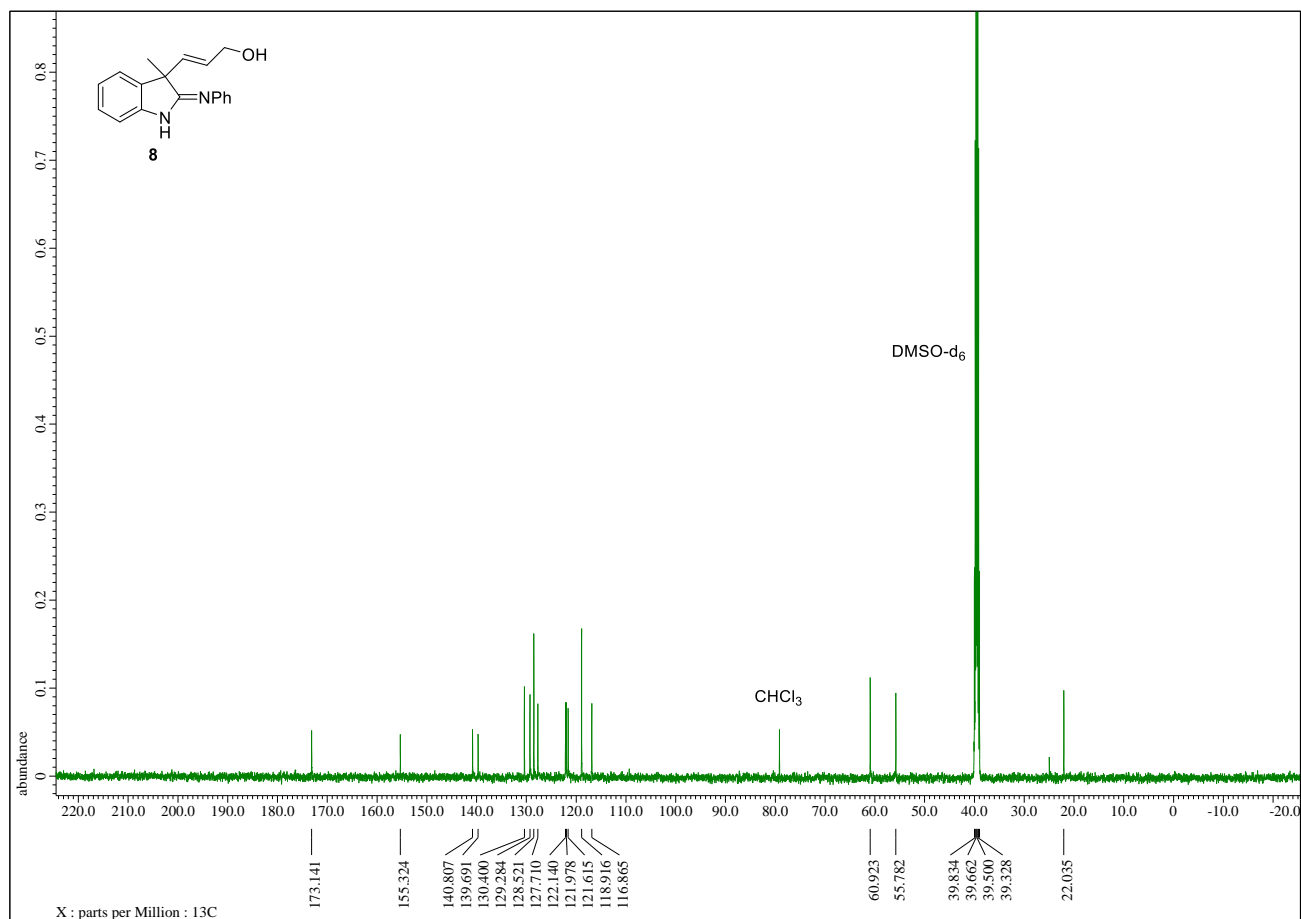

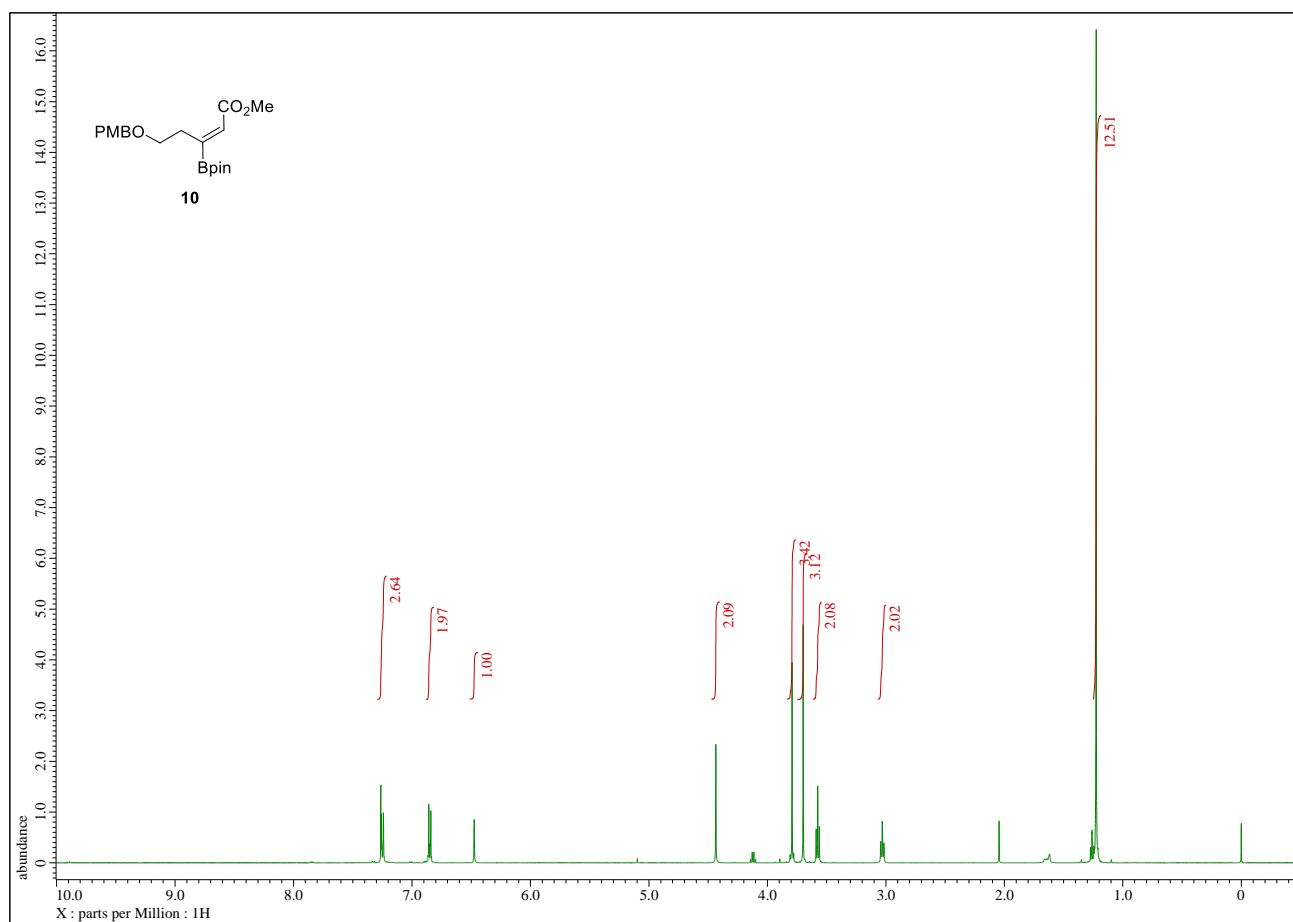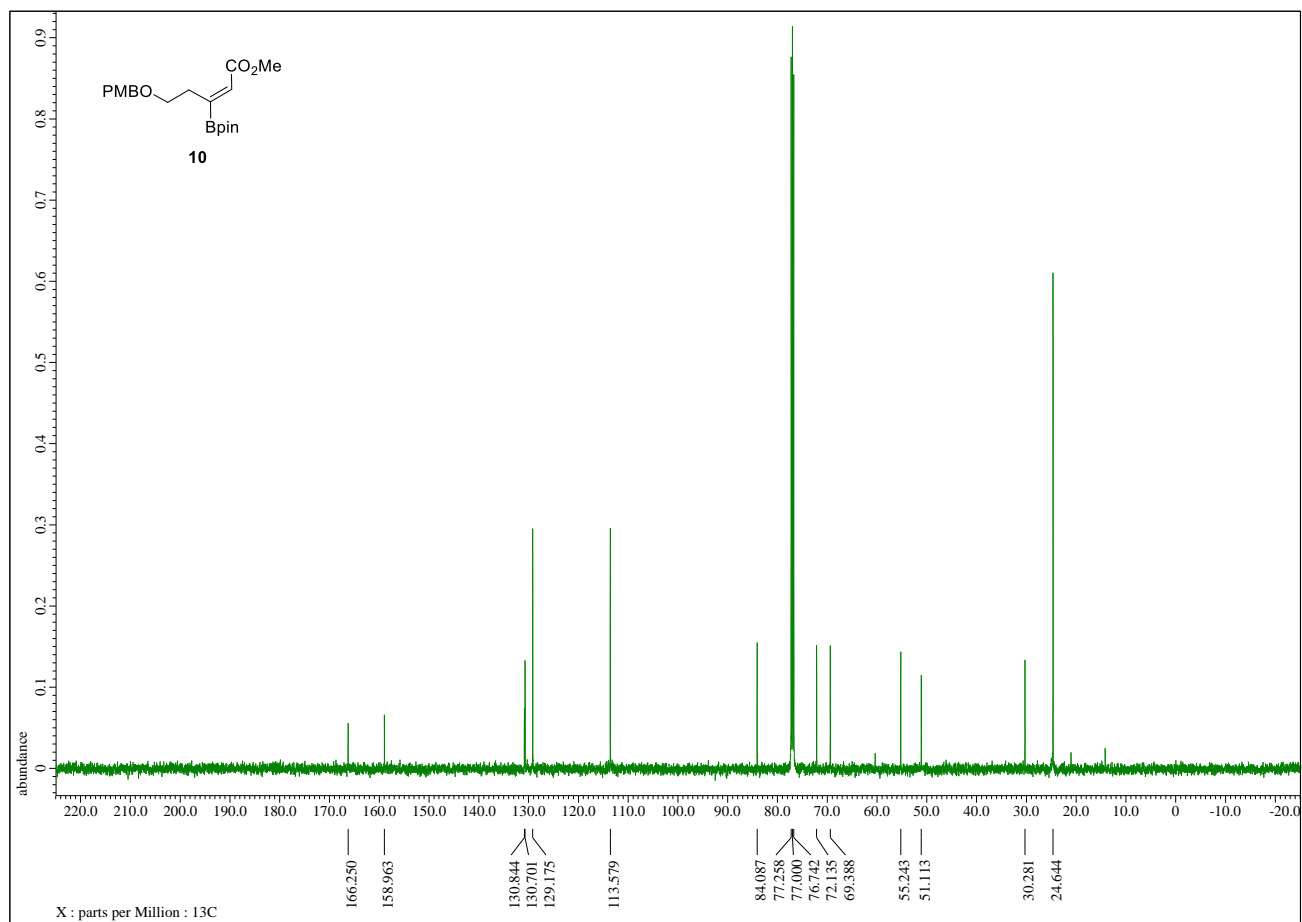

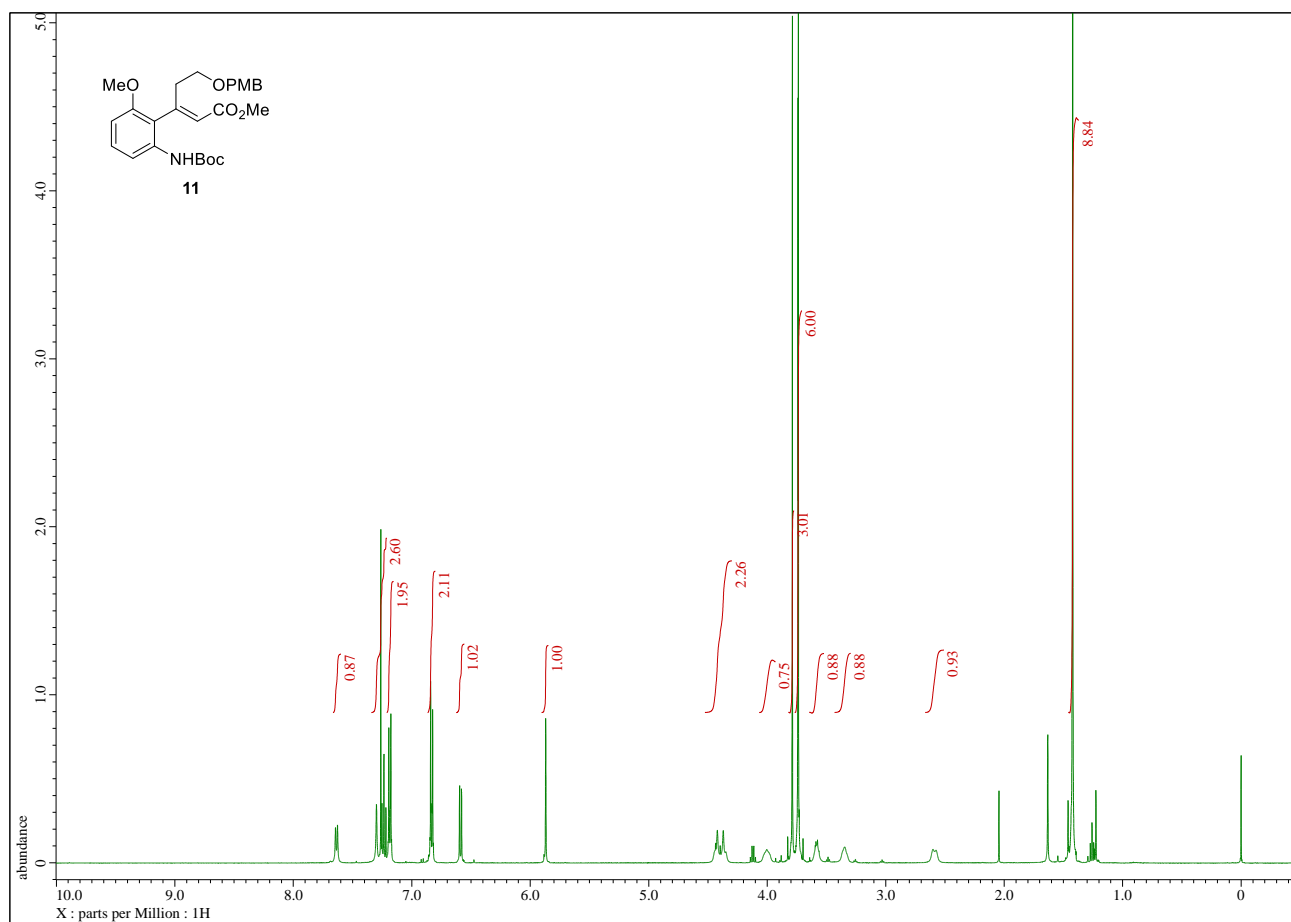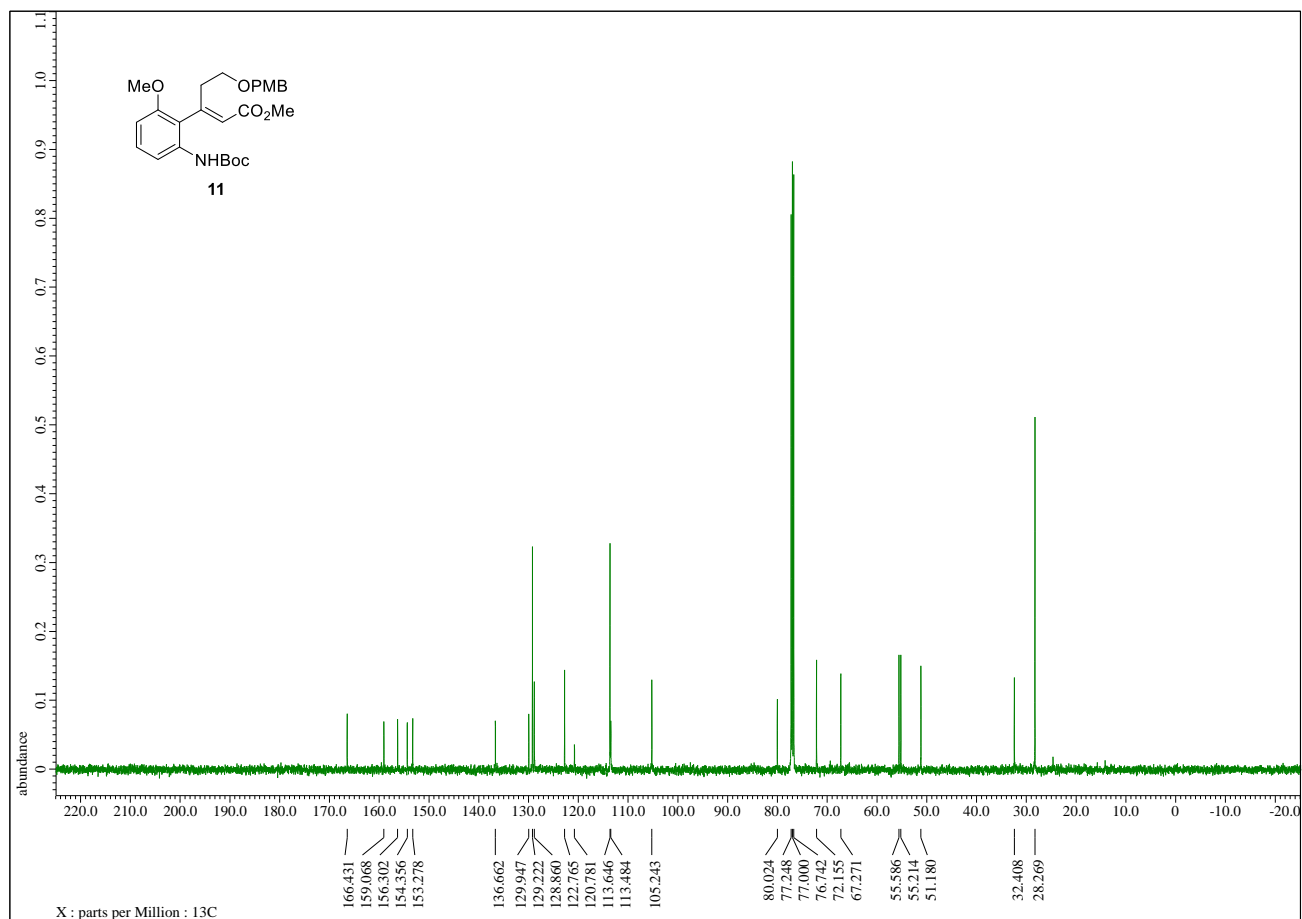

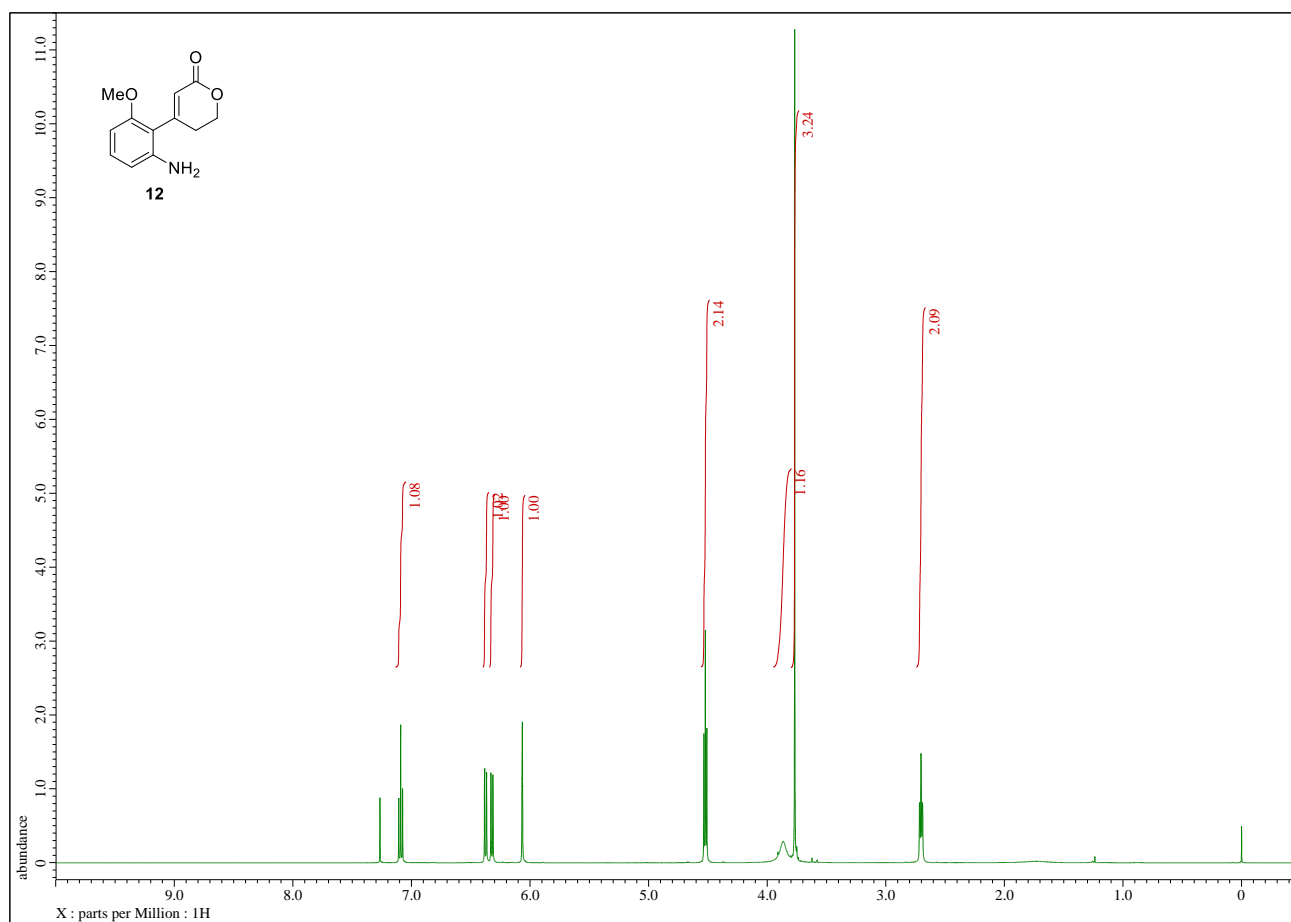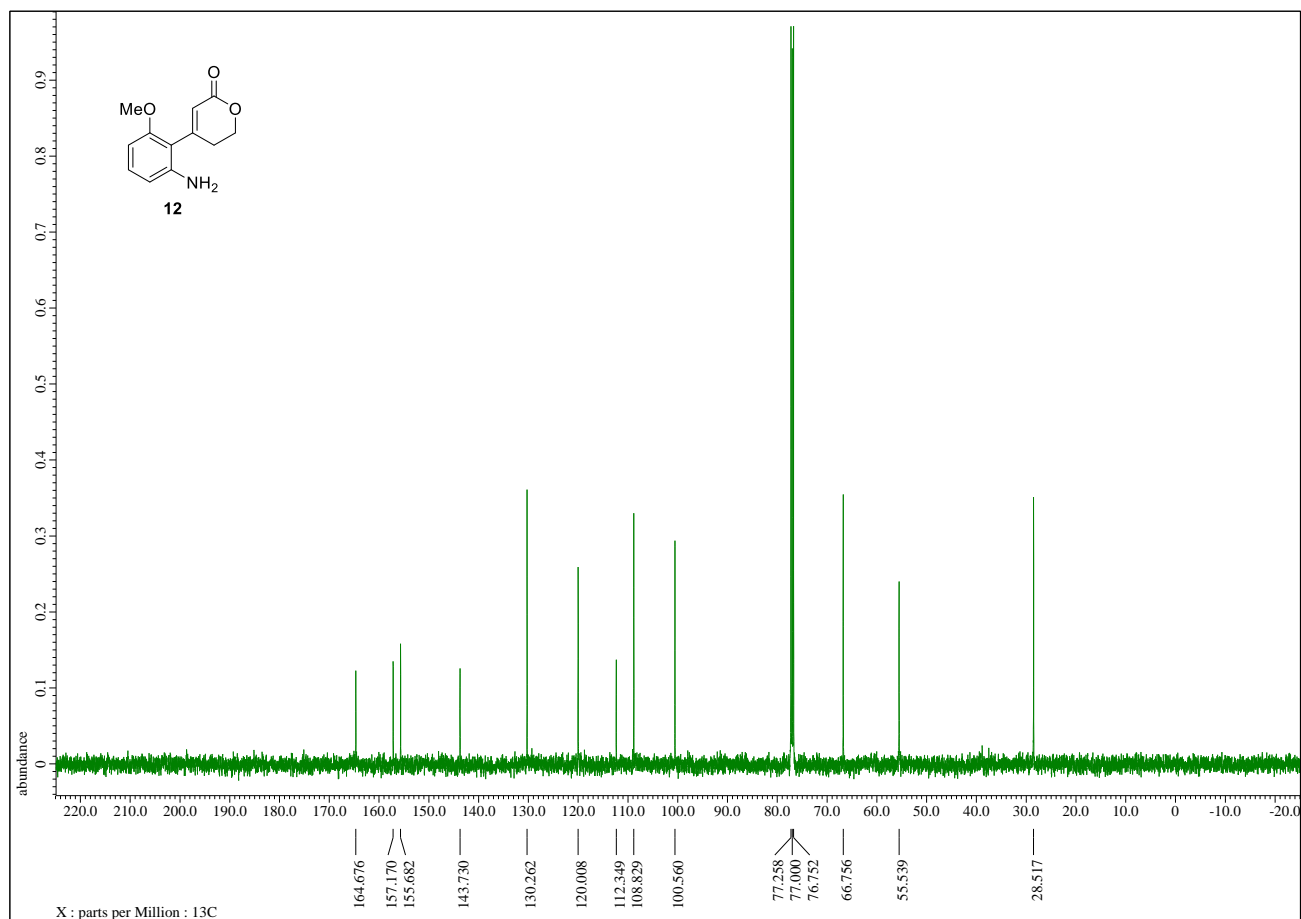



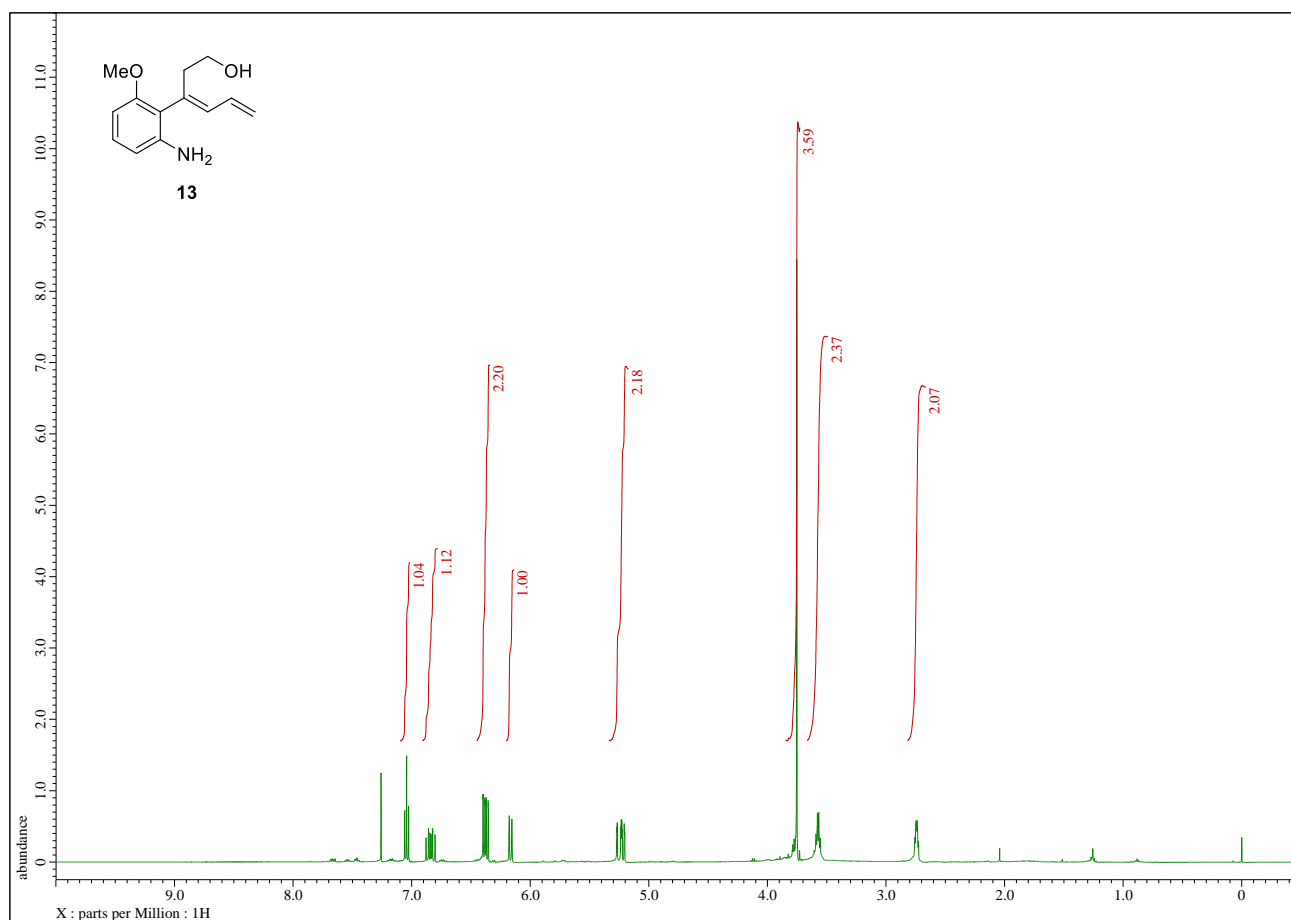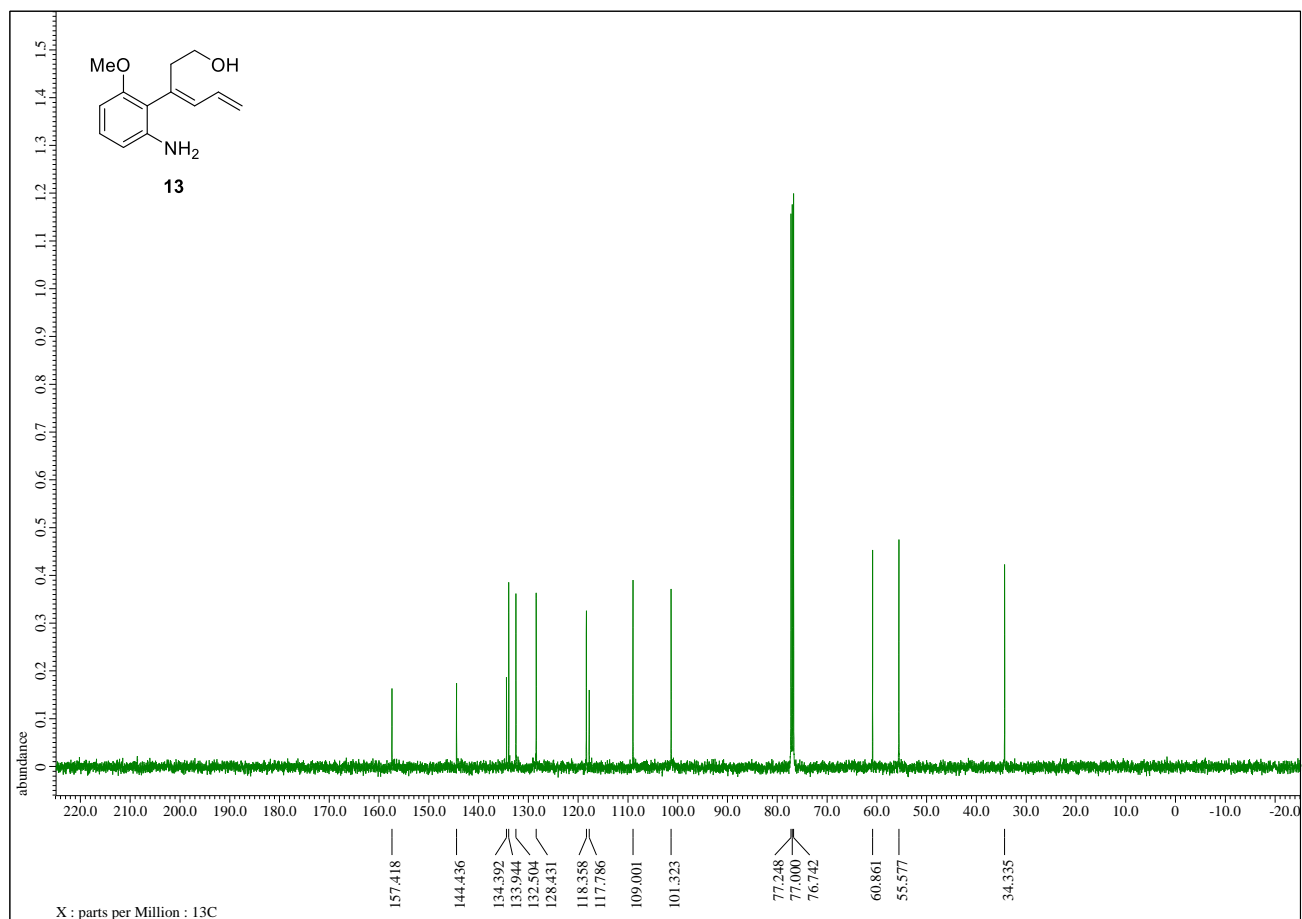

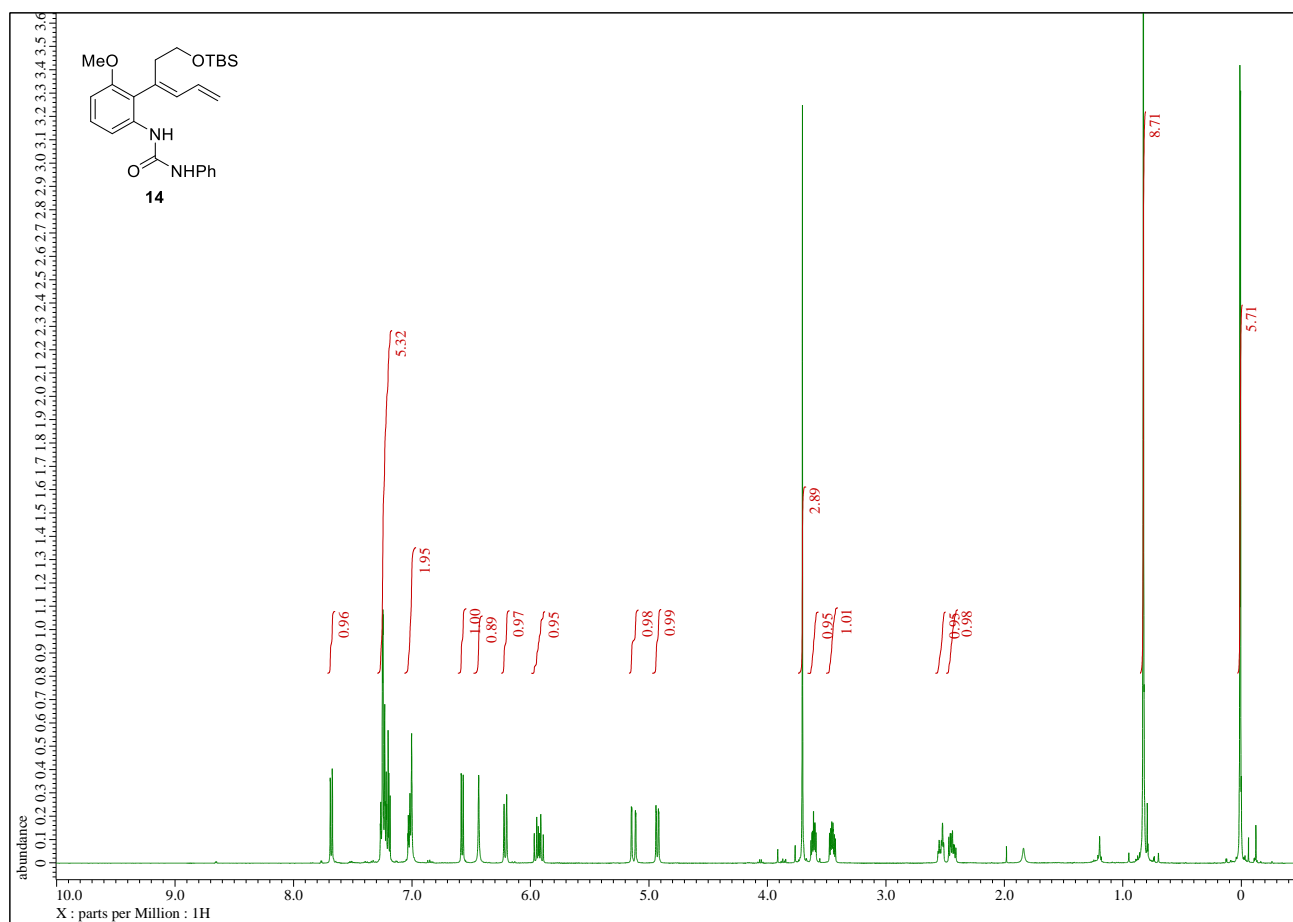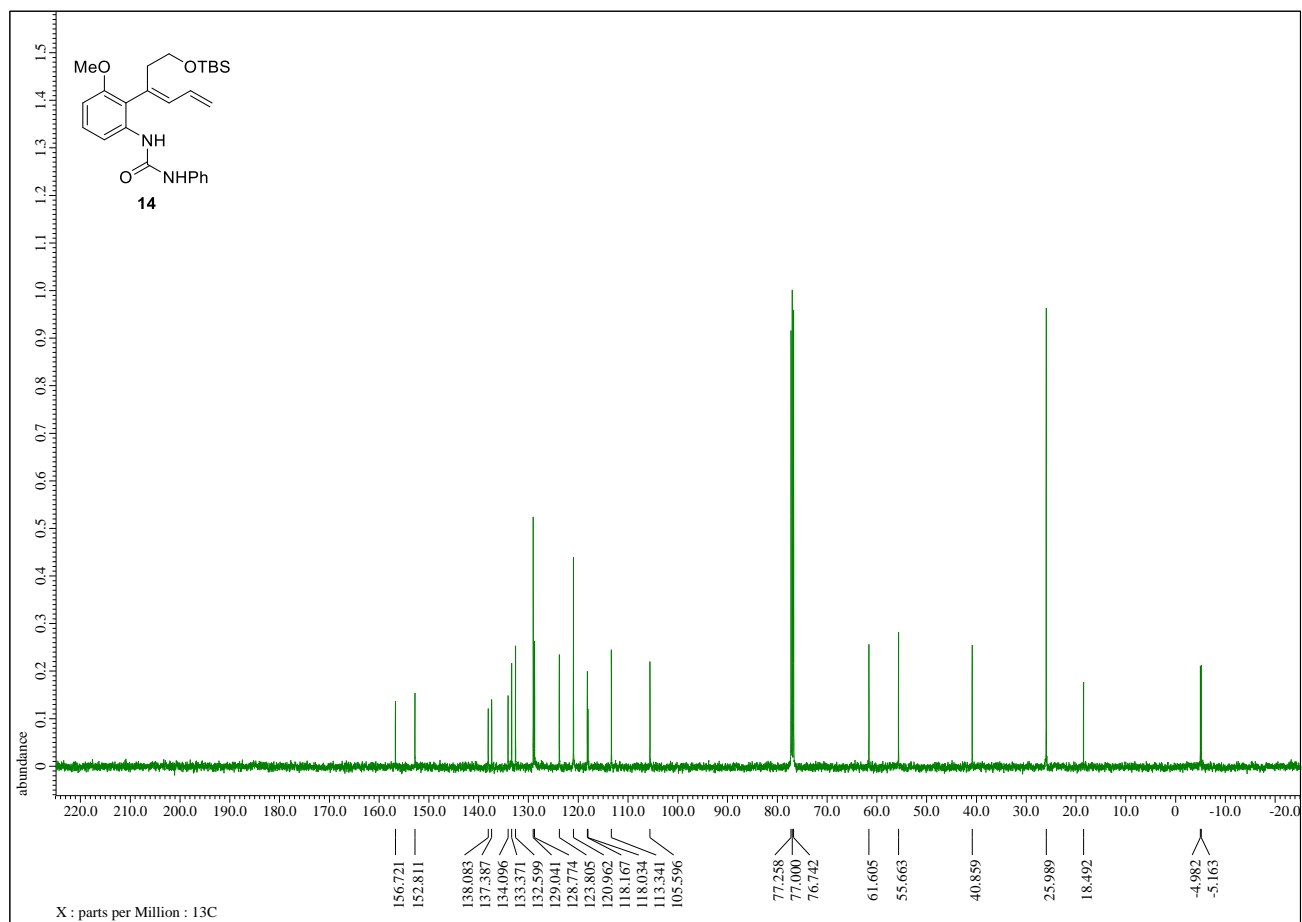

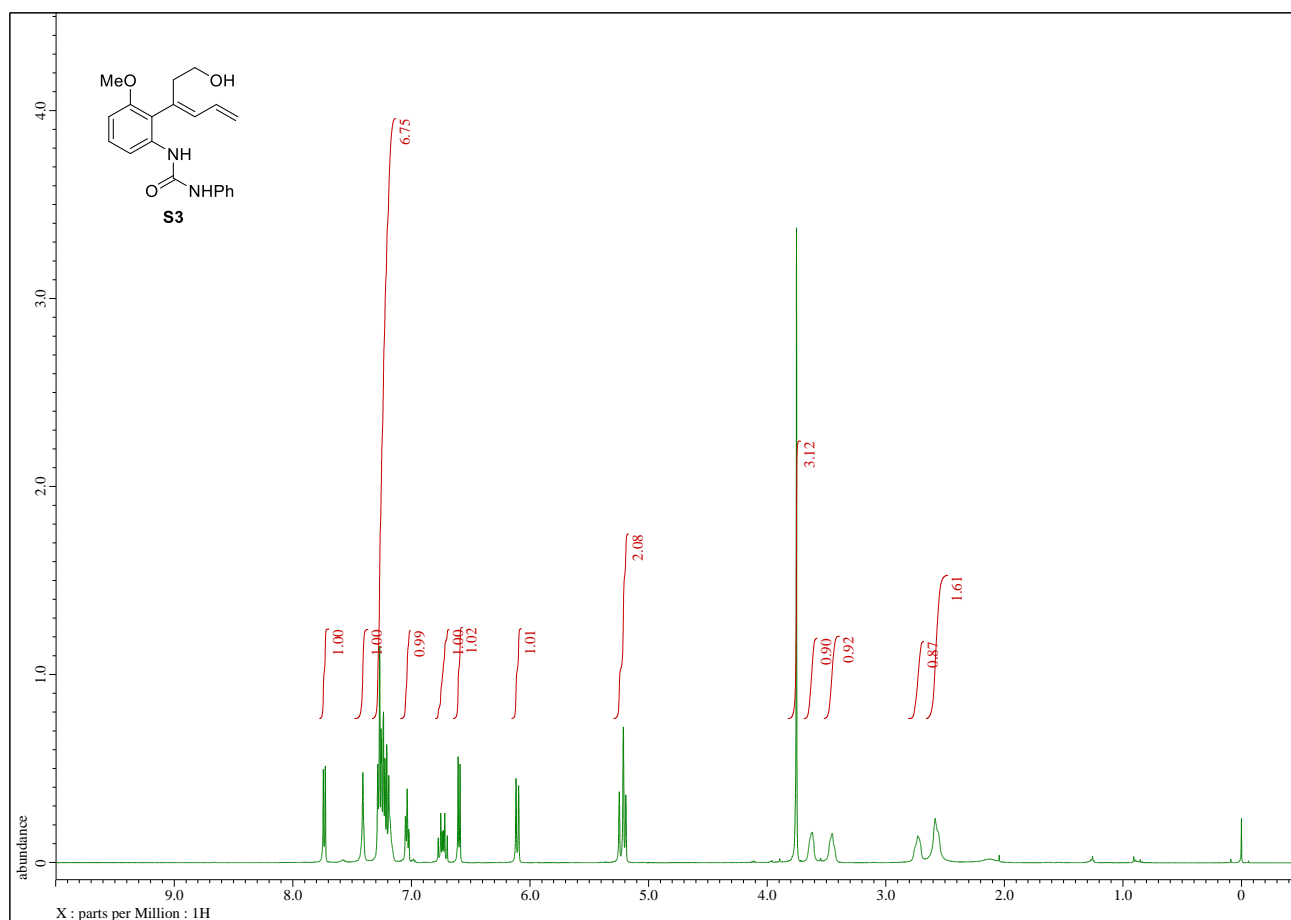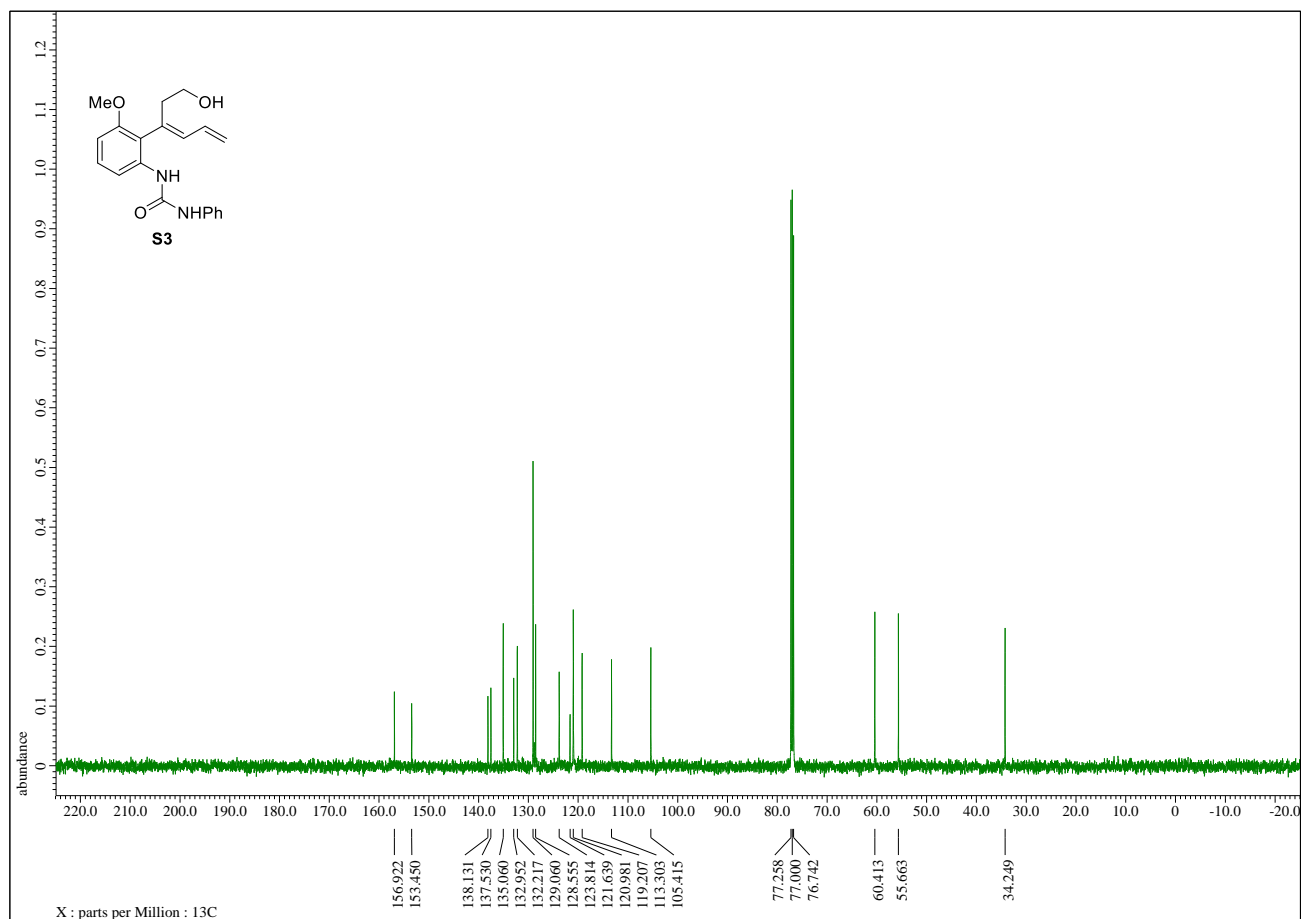

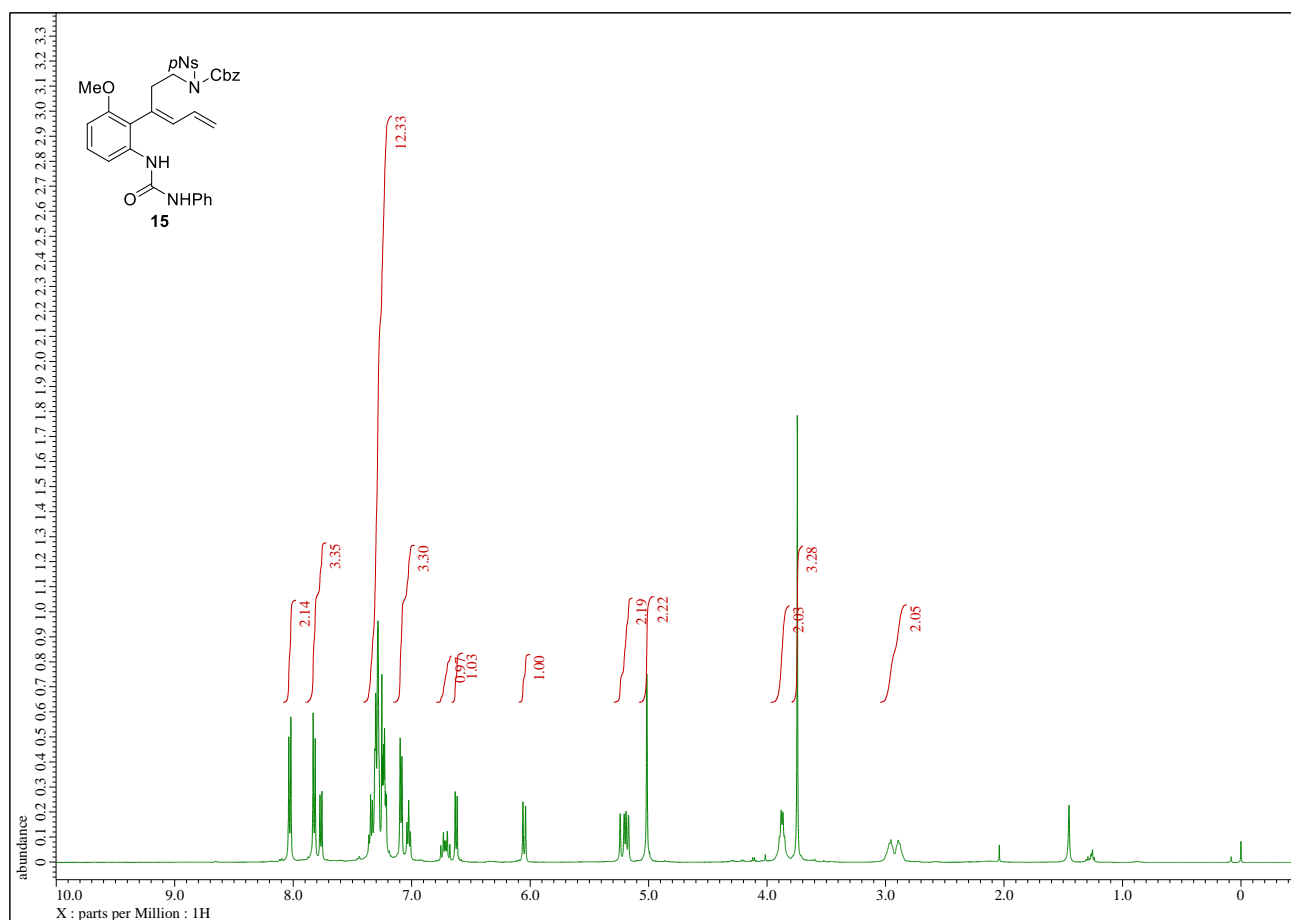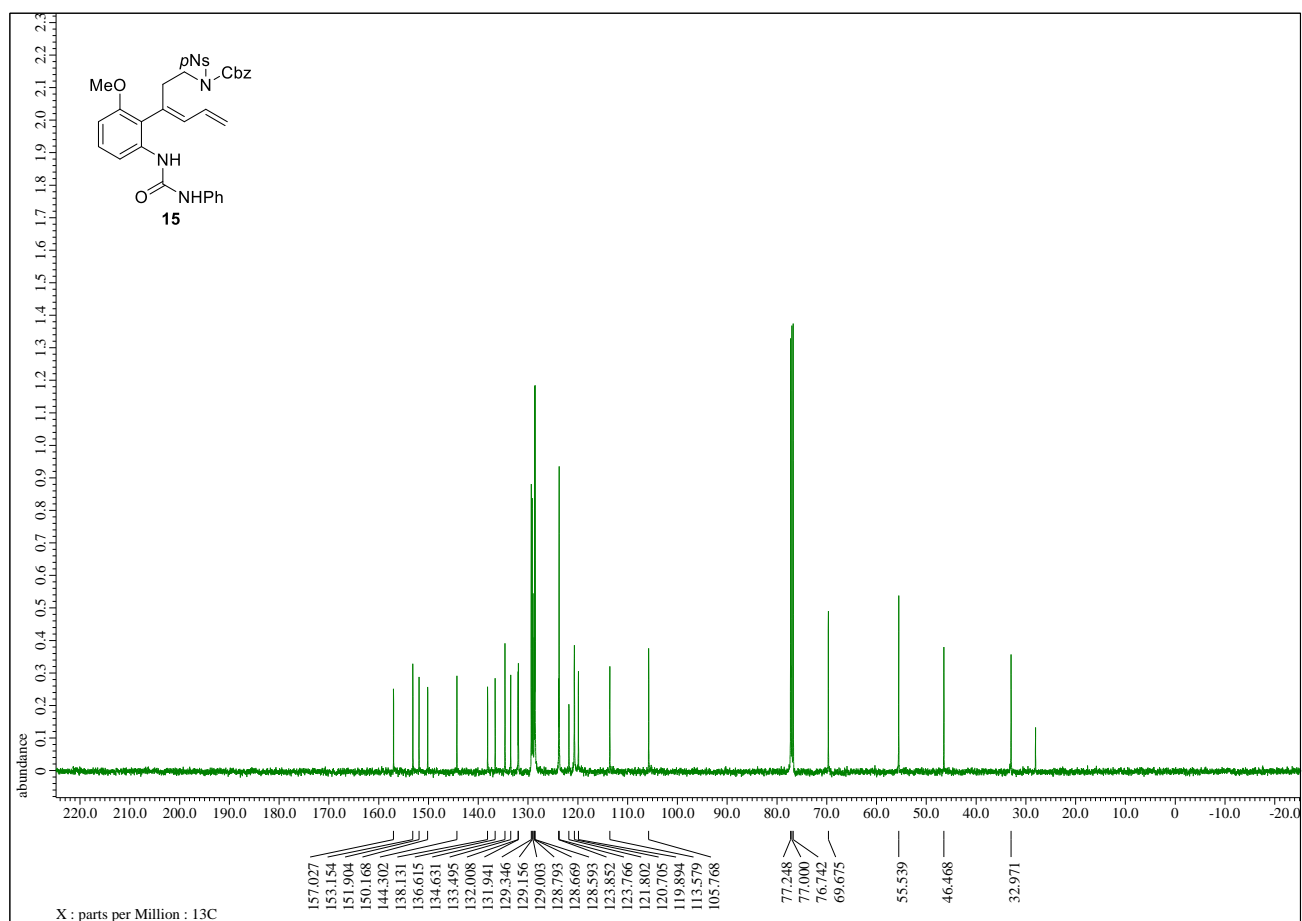

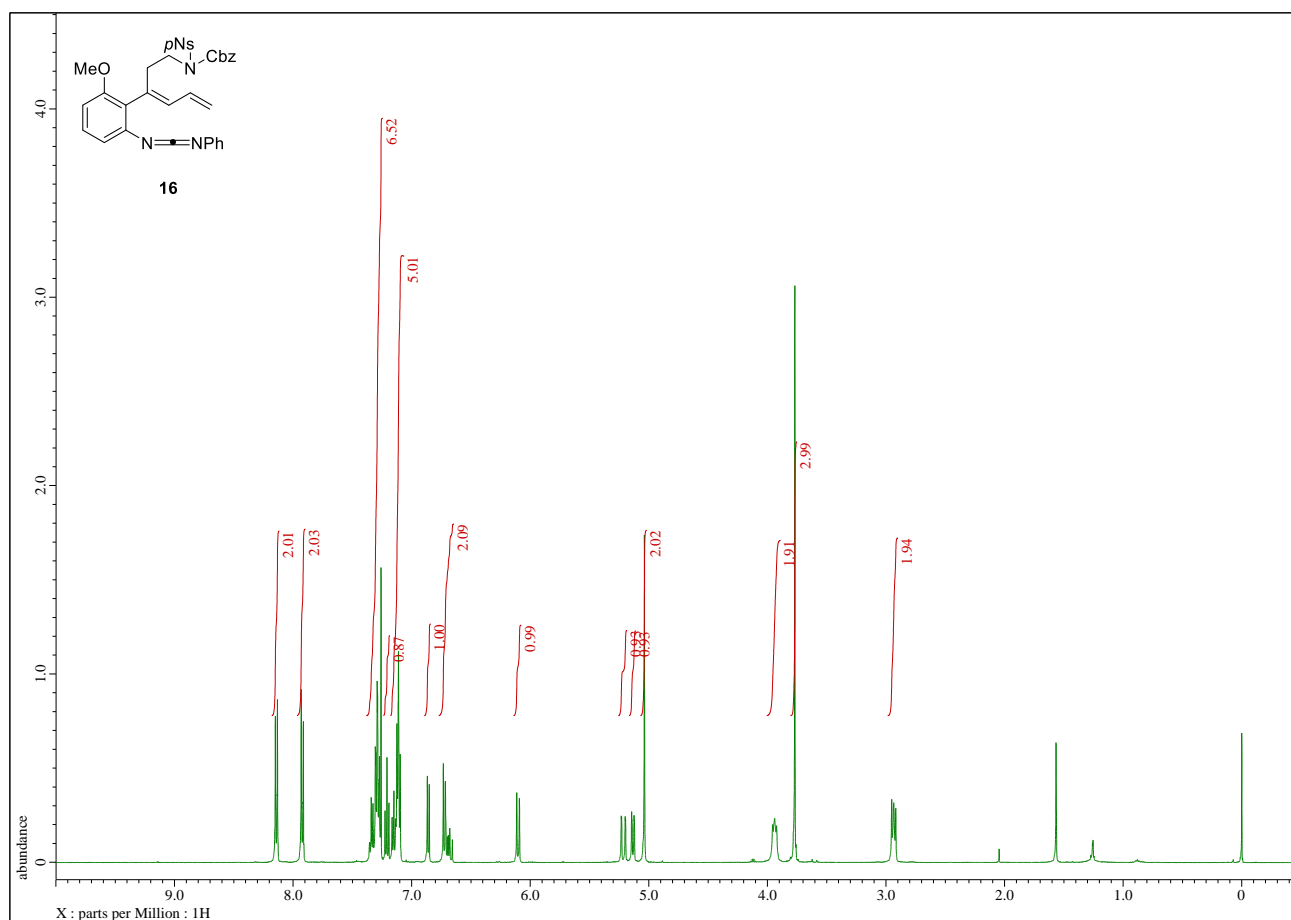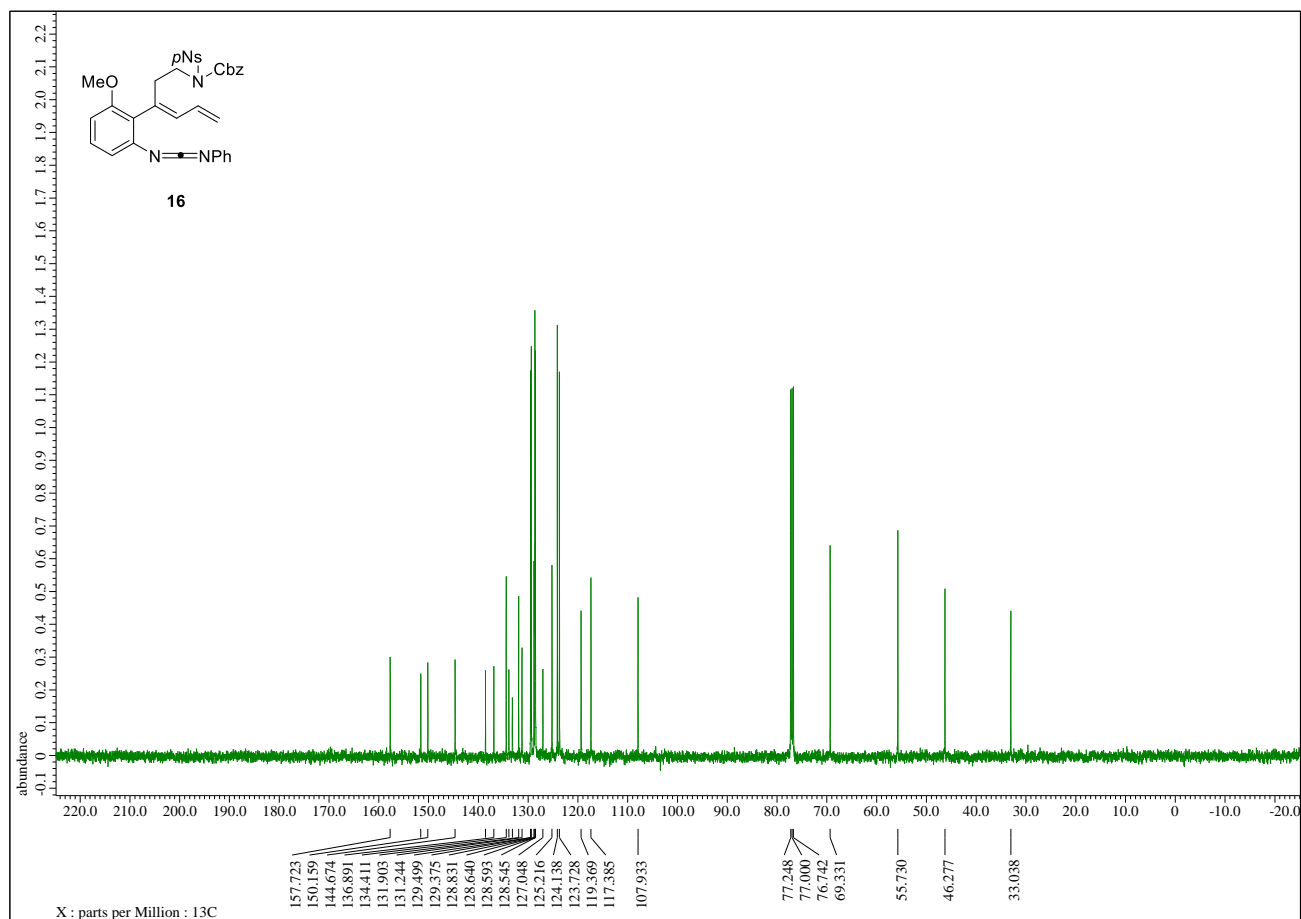

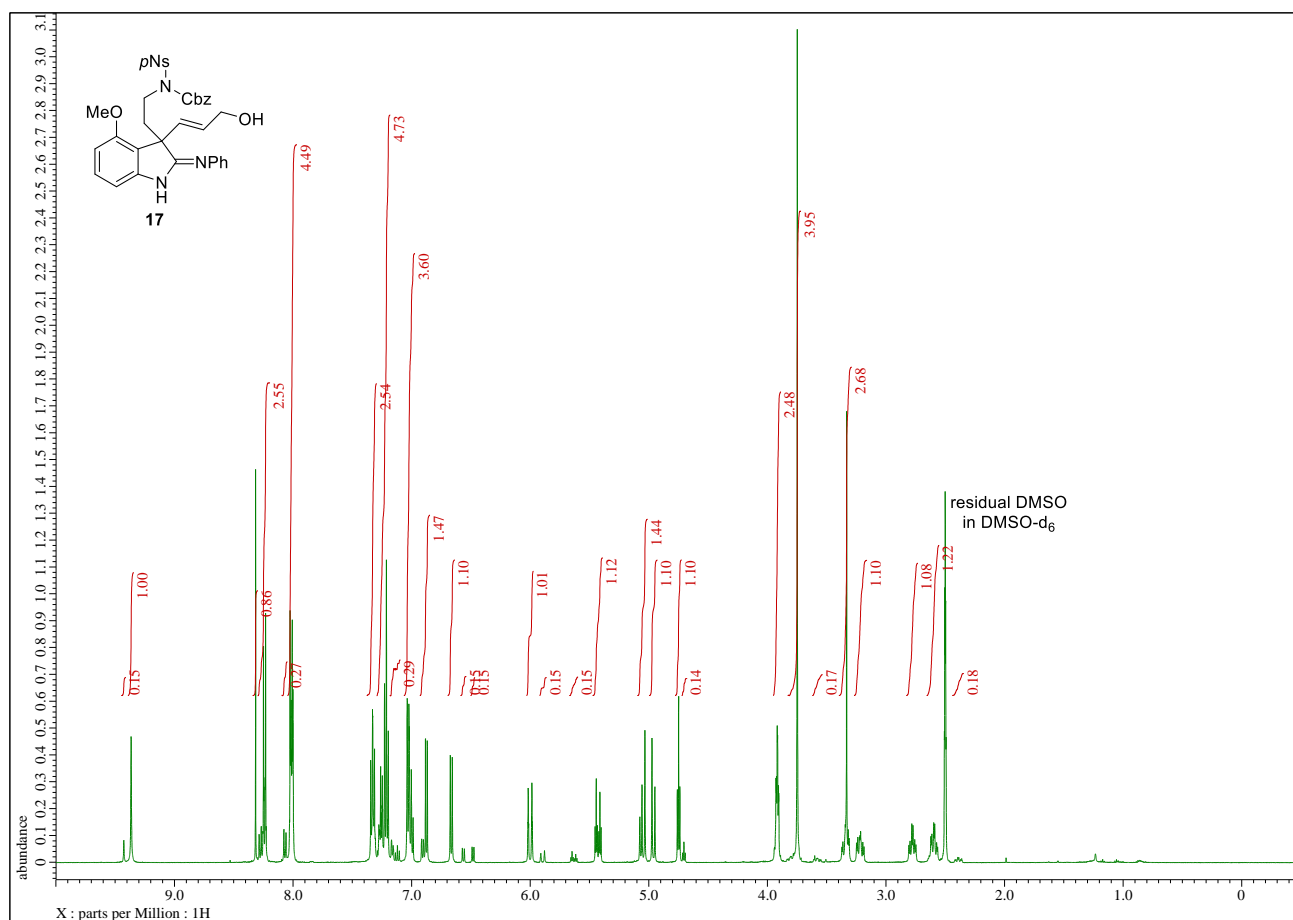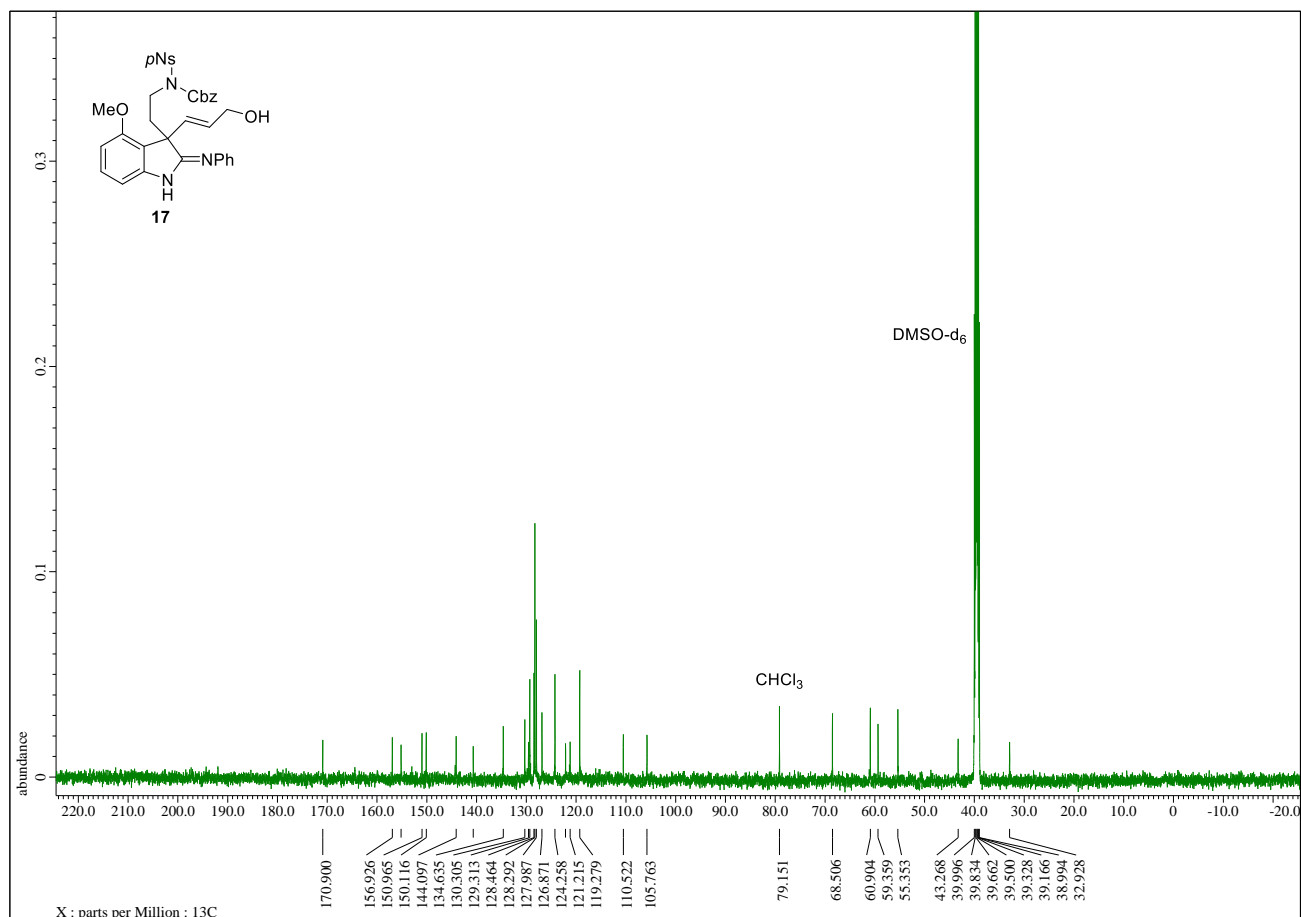

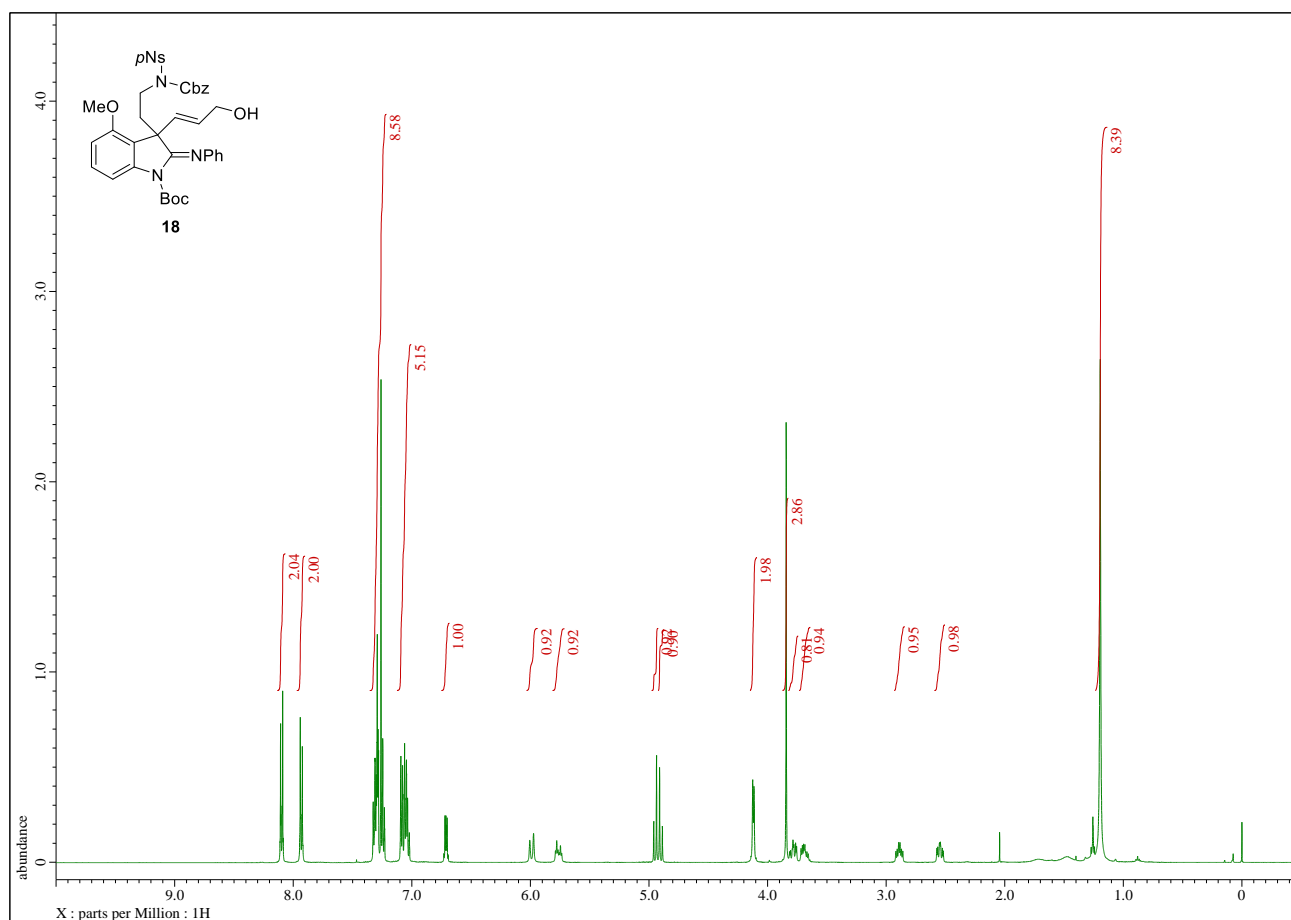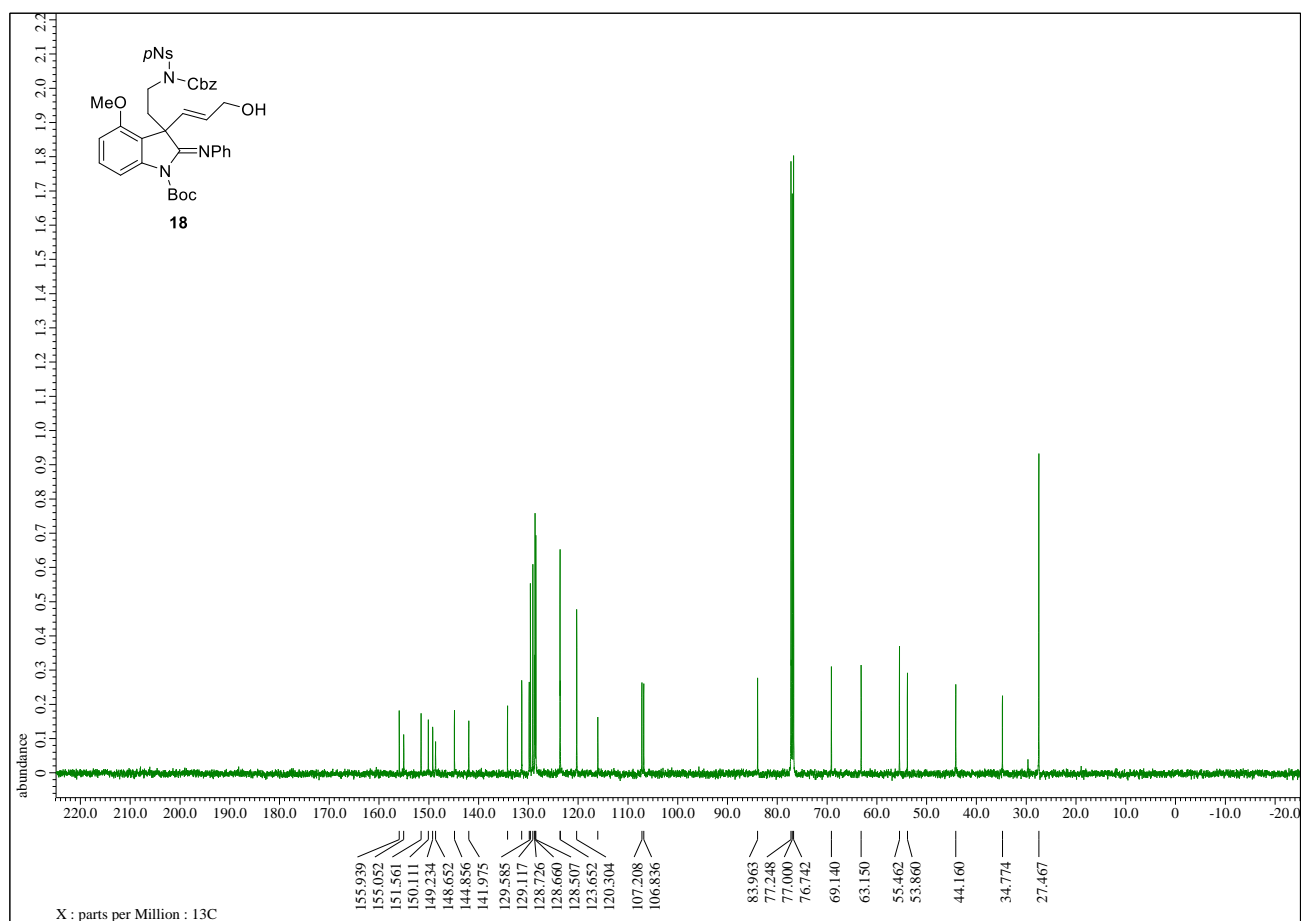

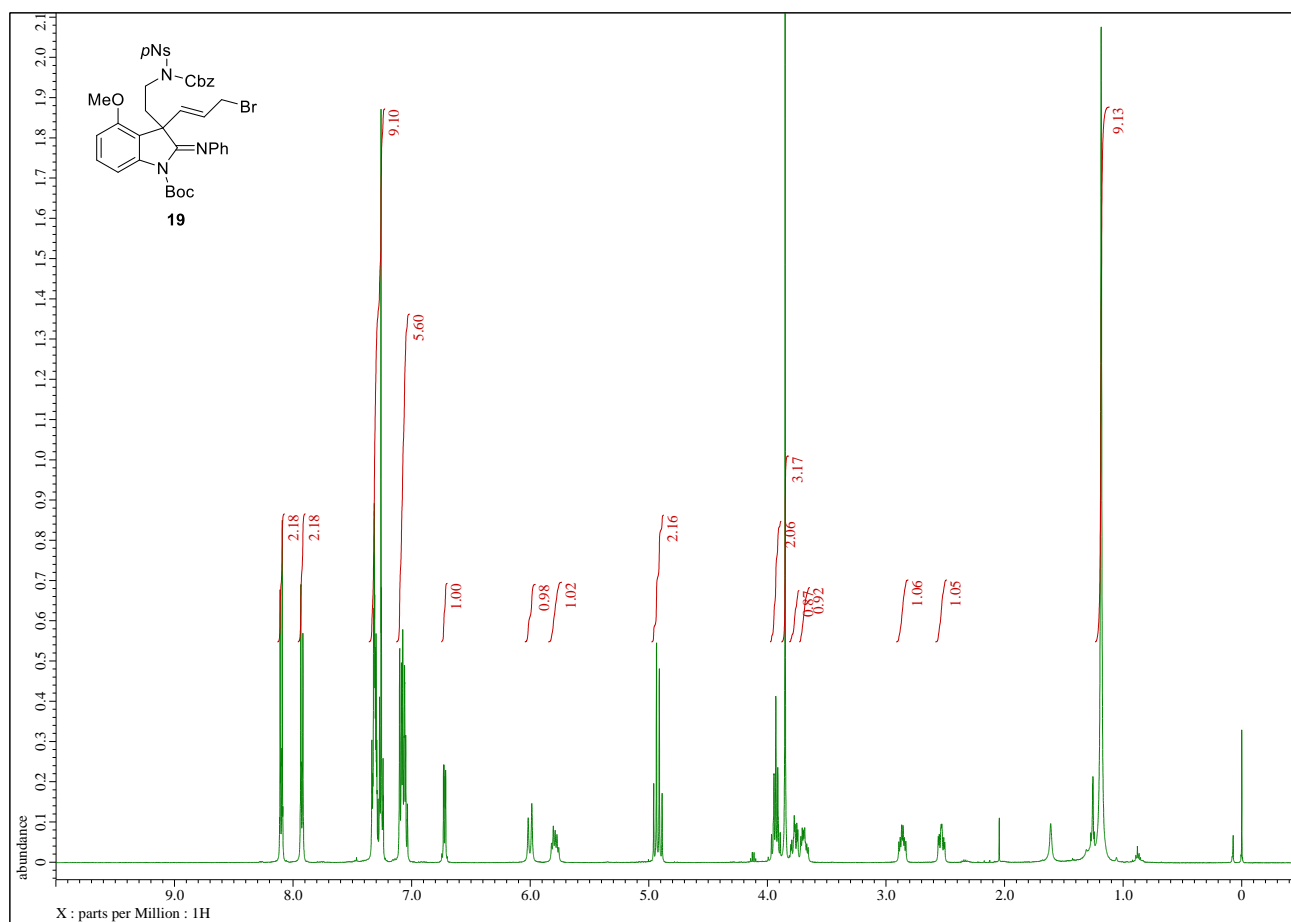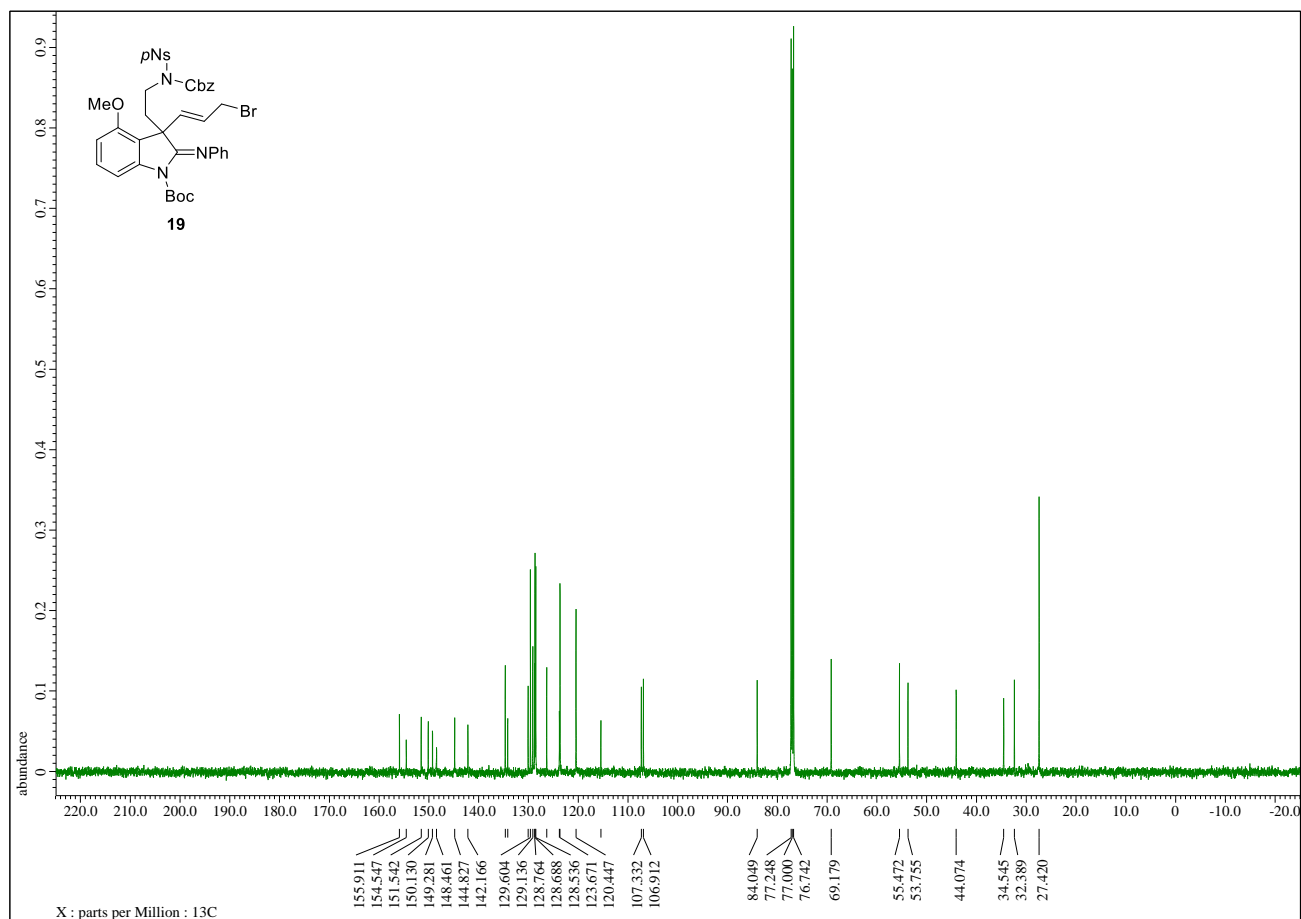



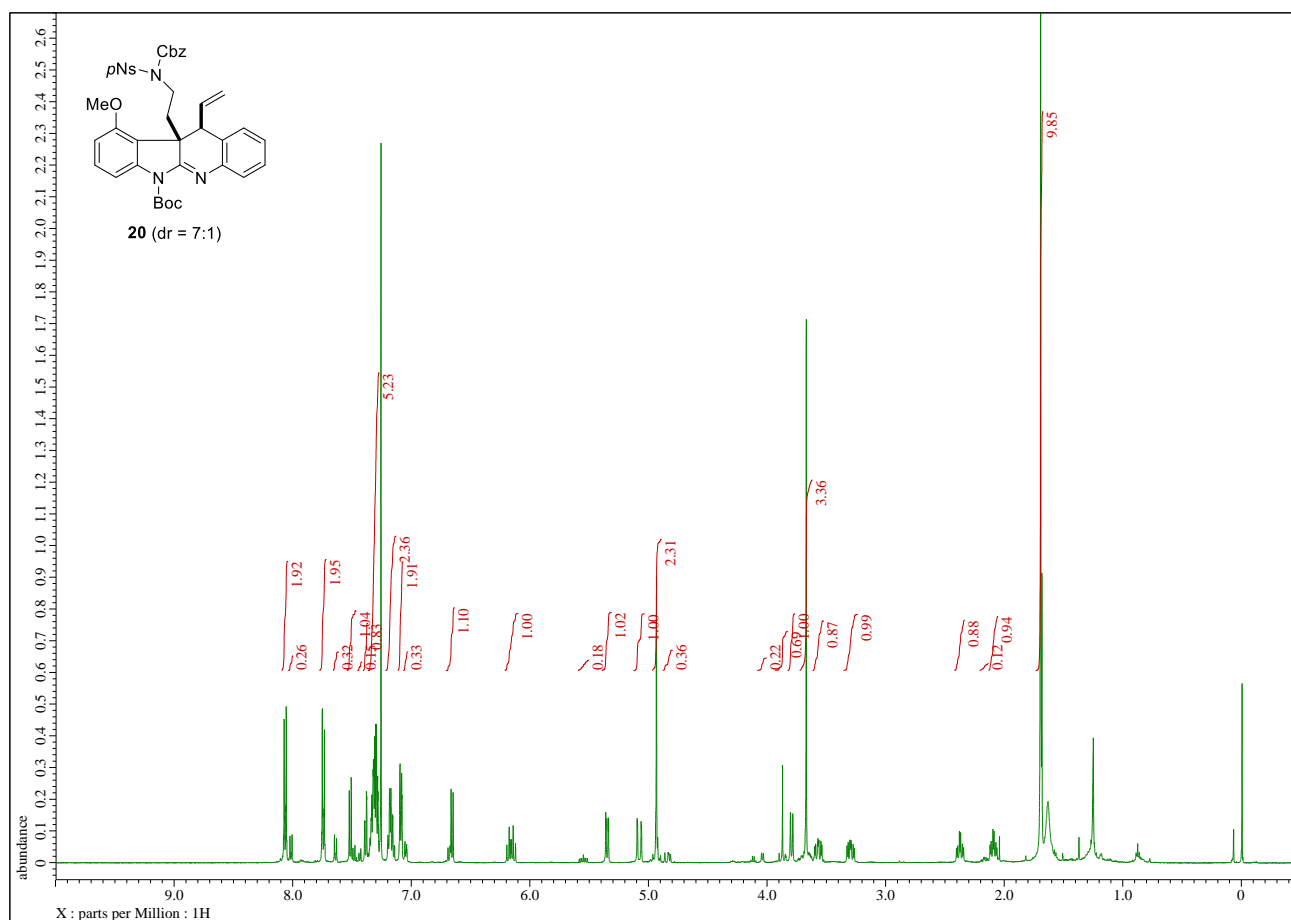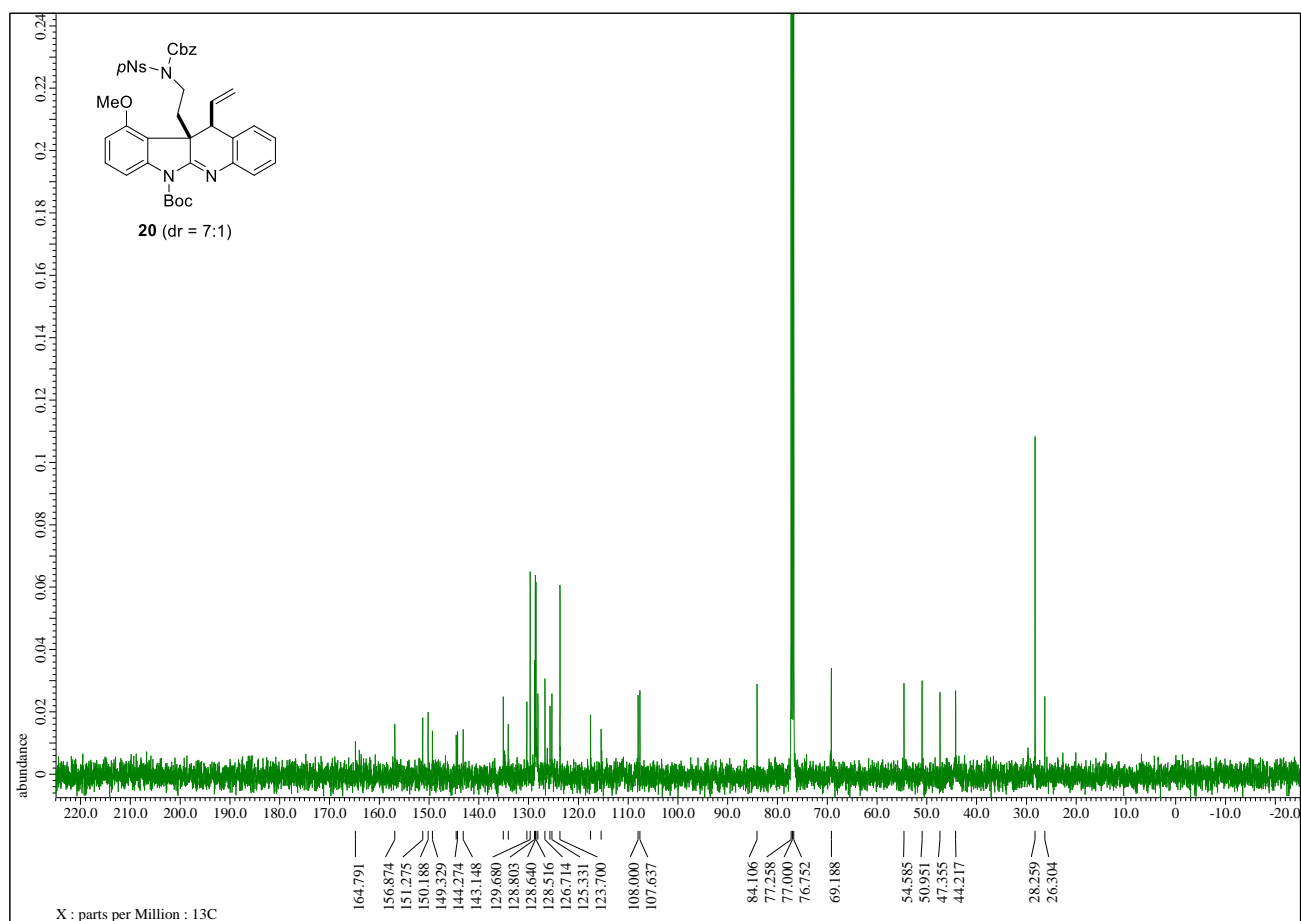

Supplement: c8ob02224k1.pdf [file c8ob02224k1.pdf]
